# Supplementary material for: Synthesis of phosphorus amidite ligand and investigation of its flexibility impact on rhodium-catalyzed hydroformylation of 1-octene
Source: Royal Society of Chemistry journal article supplement (doi:10.1039/c6ra09890h), 2016-01-01
Supplement: c6ra09890h1.pdf [file c6ra09890h1.pdf]

---

**Supporting Information for**  
**Synthesis of Phosphorus Amidite Ligand and investigation of its**  
**Flexibility impact on rhodium-catalyzed hydroformylation of 1-**  
**octene**

Weibiao Han<sup>a</sup>, Song Qin<sup>a</sup>, Xiao Shu<sup>a</sup>, Qianhui Wu<sup>a</sup>, Bin Xu<sup>b</sup> Ruixiang Li<sup>a</sup>, Xueli Zheng<sup>a\*</sup>,  
Hua Chen<sup>a\*</sup>

<sup>a</sup>Key Lab of Green Chemistry and Technology, Ministry of Education, College of  
Chemistry, Sichuan University, Chengdu 610064, China. \*Corresponding Authors E-  
mail: scuhchen@163.com and [14359385@qq.com](mailto:14359385@qq.com)

<sup>b</sup>Key Laboratory of Green Chemistry of Sichuan Institutes of Higher Education, Zigong  
643000, China

## Contents

|                                                                                                            |     |
|------------------------------------------------------------------------------------------------------------|-----|
| <b>1. Experimental</b> .....                                                                               | S2  |
| <b>2. Table 3 Optimization of reaction conditions for the hydroformylation of 1-octenewith Rh/L2</b> ..... | S5  |
| <b>3. <sup>1</sup>H, <sup>13</sup>C, <sup>31</sup>P NMR s and HRMS spectra</b> .....                       | S6  |
| <b>4. The calculated bite angle of the major intermediates</b> .....                                       | S14 |

## 2. Experimental

### General Information

Solvent were dried with standard procedures and degassed with N<sub>2</sub>. The <sup>1</sup>H, <sup>13</sup>C, and <sup>31</sup>P NMR spectra were recorded on a Bruker ARX 400 NMR instrument. Mass spectra were recorded with an AMD 40223 (Interambulacra) spectrometer. The hydroformylation products were analyzed by Agilent GC-6890N with a FID detector and a capillary column (ϕ0.25m×30mm, SE-30).

### Hydroformylation

The hydroformylation of olefins was carried out in a 60 ml stainless steel autoclave equipped with a magnetic stirrer. The aqueous solution of Rh(acac)(CO)<sub>2</sub>, a certain amount of ligands, and olefins were introduced in autoclave. Then it was evacuated and purged five times by syngas. And the autoclave was pressurized to each desired pressure with syngas. The reaction mixture was stirred at a constant speed of 10 rps when the temperature reached the desired value. After the reaction was completed, the autoclave was quickly cooled in an ice-water bath and carefully depressurized. The reaction mixture was immediately analyzed by GC to determine the activity and regioselectivity.

### Synthesis of diphenic acid (B)

The mixture of phenanthrene (8.9g, 50mmol) and glacial acetic (100ml) was heated to 85 °C, adding 30% H<sub>2</sub>O<sub>2</sub> solution (34.5ml) drop-wise in 40 minutes.

The whole mixture was stirred for 4 h at 80 °C. Then, subjecting the resulting mixture to distillation under reduced pressure to make the volume half and cooling the mixture until diphenic acid crystallises out. Yellow solid crude product was obtained by filtering the cooled mixture. The crude product was dissolved in 10% sodium carbonate solution and heating the mixture to 100 °C.

After addition of activated charcoal for decolouration and acidifying the filtrate with HCl to maintain a pH of 4-5. Cooling the solution until diphenic acid crystallizes out. Obtained 9.1g pure product and the yield is 90.0%.

<sup>1</sup>H NMR (400 MHz, CD<sub>3</sub>OD): δ=8.00 (dd, *J*=7.8, 1.4 Hz, 2H), 7.55 (td, *J*=7.5, 1.4 Hz, 2H), 7.44 (td, *J*=7.6, 1.3 Hz, 2H), 7.19 (dd, *J*=7.6, 1.2 Hz, 2H).

### Synthesis of C

A solution of BF<sub>3</sub>·Et<sub>2</sub>O (2.7ml, 0.19mmol) in THF (15 mL) was added slowly to a room temperature solution of NaBH<sub>4</sub> (1.78g, 0.44mol) and carboxylic acids (3.8g, 0.016mol) in THF (25 mL) under an inert atmosphere. The mixture was heated to reflux until TLC monitoring showed complete consumption of the substrate. The reaction mixture was cooled to 0 °C, quenched with water (caution: vigorous gas evolution) keeping the temperature below 10 °C. The THF was removed under reduced pressure, CH<sub>2</sub>Cl<sub>2</sub> (or Et<sub>2</sub>O) was added, and the stirring was continued for another 1 h. The organic layer was separated, washed with brine, dried over MgSO<sub>4</sub>, and

the solvent was removed under reduced pressure. Purification of the residue by SiO<sub>2</sub> chromatography gave pure alcohol. Obtained pure product 3.0g and the yield is 90.0%.

<sup>1</sup>H NMR (400 MHz, *d*<sub>6</sub>-DMSO): δ=7.61-7.53 (m, 2H), 7.39 (td, *J*=7.5, 1.3 Hz, 2H), 7.29 (td, *J*= 7.4, 1.2 Hz, 2H), 7.06 (dd, *J*=7.5, 1.2 Hz, 2H), 5.04 (t, *J*=5.4 Hz, 2H), 4.16 (qd, *J*=13.6, 5.4 Hz, 4H).

### Synthesis of Ligand L1

To a solution of backbone C (3.27 mmol, 0.700g), DMAP (0.65 mmol, 80.0mg) and chlorodipyrrolylphosphine (7.26mmol, 1.43ml) in THF (40 ml) was added dropwise a solution of triethylamine (2ml) in 15ml THF at -15°C in 30 minutes. The triethylamine HCl salts were formed immediately after the addition. The reaction mixture was stirred for 1.5h at room temperature. The triethylamine HCl salts were then filtered off, and the solvent was removed under vacuum. The crude product was extracted by pentane (10 ml), to afford white oil products 0.73g and the yield is 41.1%.

<sup>1</sup>H NMR (400 MHz, CDCl<sub>3</sub>): δ=7.38 (d, *J*=4.1 Hz, 4H), 7.17 (dd, *J*=5.9, 1.9 Hz, 2H), 7.10 (d, *J*=7.5 Hz, 2H), 6.84-6.76 (m, 8H), 6.29-6.22 (m, 8H), 4.56-4.43 (m, 4H). <sup>13</sup>C NMR (100 MHz, CDCl<sub>3</sub>): δ=67.20(d, *J*<sub>PC</sub>=20Hz), 112.16(d, *J*<sub>PC</sub>=4Hz), 121.34(d, *J*<sub>PC</sub>=16Hz), 128.37 (d, *J*<sub>PC</sub>=21Hz), 129.29, 130.02, 134.72(d, *J*<sub>PC</sub>=9Hz), 139.58; <sup>31</sup>P NMR (166 MHz, CDCl<sub>3</sub>): δ=112.34. HRMS (ES+) Calcd. For C<sub>30</sub>H<sub>28</sub>N<sub>4</sub>O<sub>2</sub>P<sub>2</sub>Na [M+ Na<sup>+</sup>] 538.1687, Found: 538.1674

### Synthesis of Ligand L2

To a solution of backbone C (3.27 mmol, 0.700g), DMAP (0.65 mmol, 80.0mg) and chlorodiphenylphosphane (7.26mmol, 1.30ml) in THF (40 ml) was added dropwise a solution of triethylamine (2ml) in 15ml THF at -15°C in 30 minutes. The triethylamine HCl salts were formed immediately after the addition. The reaction mixture was stirred for 1.5h at room temperature. The triethylamine HCl salts were then filtered off, and the solvent was removed under vacuum. The crude product was extracted by n-hexane (10 ml), to afford white oil products 0.86g and the yield is 45.0%.

<sup>1</sup>H NMR (400 MHz, *d*<sub>6</sub>-DMSO): δ=7.55 (d, *J*=7.4 Hz, 2H), 7.44-7.39 (m, 2H), 7.37-7.26 (m, 22H), 7.15 (d, *J*=7.4 Hz, 2H), 4.58-4.44 (m, 4H). <sup>13</sup>C NMR (101 MHz, *d*<sub>6</sub>-DMSO): δ=141.79 (d, *J*=19.0 Hz), 139.50 (s), 136.55 (d, *J*=9.5 Hz), 130.25 (d, *J*=9.2 Hz), 130.14 (s), 130.03 (d, *J*= 9.1 Hz), 129.82 (d, *J*= 5.6 Hz), 129.30 (s), 128.86 (dd, *J*= 6.8, 1.2 Hz), 128.23 (d, *J*= 19.0 Hz), 69.36 (d, *J*= 20.3 Hz). <sup>31</sup>P NMR (162 MHz, *d*<sub>6</sub>-DMSO): δ=112.04 (s). HRMS (ES+) Calcd.

---

For  $C_{30}H_{28}N_4O_2P_2Na$  [ $M^+ Na^+$ ] 582.1878, Found: 582.1858

### Synthesis of Ligand L3

A solution of 2,2'-dihydroxy-1,1'-biphenyl (1.7g, 9.0mmol) in 25mL of THF was added dropwise to a solution of chlorodipyrrolylphosphine (3mL, 18.0mmol) and triethylamine (6.0ml, 43.0mmol) in 30 mL of THF at 0°C. The triethylamine, HCl salts were filtered off after 12 h of stirring at room temperature and the solvent was removed under vacuum to get yellow oily product. The crude product was recrystallize by ethyl alcohol (10ml) to get white solid 1.94g and the yield is 42.4%.

$^1H$  NMR (400 MHz,  $CDCl_3$ ):  $\delta$ =7.20 (dd,  $J$ =12.3, 5.0 Hz, 4H), 7.09 (t,  $J$ =7.4 Hz, 2H), 6.78 (d,  $J$ =8.0 Hz, 2H), 6.63 (s, 8H), 6.16 (s, 8H).  $^{31}P$  NMR (162 MHz,  $CDCl_3$ )  $\delta$ =108.31 (s).

### Synthesis of Ligand L4

To a solution of backbone C (1.7g, 9.0mmol) chlorodiphenylphosphane (3.3mL, 18.0mmol) in THF (25mL) was added dropwise a solution of triethylamine (6.0 ml, 43mmol) in THF (30mL) at -15°C in 30 minutes. The triethylamine HCl salts were formed immediately after the addition. The reaction mixture was stirred overnight at room temperature. The triethylamine HCl salts were then filtered off, and the solvent was removed under vacuum. The crude product was extracted by n-hexane (10 ml), to afford white oil products 1.85g and the yield is 37.1%.

$^1H$  NMR (400 MHz,  $CDCl_3$ ):  $\delta$ =7.21 (ddd,  $J$ =7.6, 4.3, 1.5 Hz, 10H), 7.16 (ddd,  $J$ =9.6, 5.5, 3.5 Hz, 6H), 7.13-7.06 (m, 10H), 6.97 (td,  $J$ = 7.4, 0.9 Hz, 2H).  $^{31}P$  NMR (162 MHz,  $CDCl_3$ )  $\delta$ =111.81 (s).

### Synthesis of Ligand L5

Triphenylphosphine (5.2g, 19.8mmol), THF (30ml) and lithium (0.45g, 64.8mmol) were added respectively in 100 ml three flask. Then reaction was stirred overnight at room temperature and the lithium was dissolved. The flask was cooled to 10°C, and tertiary butyl chloride (2.0 ml, 18.4 mmol) was added over 1 h while the temperature was held below 30°C with a water bath.

After the addition, the reaction was heated to 40°C for 0.5 h and then cooled to -10°C. 2,2'-Bis(chloromethyl)-1,1'-biphenyl (3.0g, 8.8mmol) in THF (15ml) was added dropwise to the solution of the anion and heated to reflux for 0.5 h after the addition. The solvent was removed under vacuum and then added dichloromethane (20ml) and deionized water (20ml). The organic layer was separated and dried by  $MgSO_4$ . Cooling the solution, After added ethyl alcohol to oil generation and then cooled it, the solution pure BISBI crystallizes out.

Obtained 3.9g pure product and the yield is 70.0%.

<sup>1</sup>H NMR (400 MHz, CDCl<sub>3</sub>): δ=7.36-7.27 (m, 12H), 7.22 (d, *J*=7.3 Hz, 4H), 7.14-7.08 (m, 8H), 7.03 (dd, *J*=5.3, 3.5 Hz, 2H), 6.94-6.87 (m, 2H), 3.21 (dd, *J*=49.6, 13.5 Hz, 4H). <sup>31</sup>P NMR (162 MHz, CDCl<sub>3</sub>): δ=-10.53 (s).

### 3. Table 3 Optimization of reaction conditions for the hydroformylation of 1-octene with Rh/L2

| Entry | P/Rh | P(Mpa) | T (°C) | Con. % <sup>a</sup> | Aldehyde % <sup>b</sup> | Oct. % <sup>c</sup> | Iso. % <sup>d</sup> | n/i |
|-------|------|--------|--------|---------------------|-------------------------|---------------------|---------------------|-----|
| 1     | 0    | 2.0    | 100.0  | 97.6                | 23.6                    | 46.4                | 30.0                | 0.7 |
| 2     | 5    | 2.0    | 100.0  | 64.4                | 65.4                    | 8.7                 | 25.2                | 1.2 |
| 3     | 10   | 2.0    | 100.0  | 83.0                | 68.4                    | 5.2                 | 14.3                | 1.5 |
| 4     | 15   | 2.0    | 100.0  | 97.7                | 98.0                    | 0.4                 | 1.5                 | 3.7 |
| 5     | 20   | 2.0    | 100.0  | 89.6                | 96.4                    | 1.2                 | 2.5                 | 4.7 |
| 6     | 25   | 2.0    | 100.0  | 90.6                | 97.0                    | 1.0                 | 1.9                 | 5.8 |
| 7     | 30   | 2.0    | 100.0  | 57.6                | 93.8                    | 3.6                 | 2.8                 | 5.2 |
| 8     | 20   | 2.0    | 60.0   | 51.0                | 96.9                    | 1.2                 | 1.0                 | 5.0 |
| 9     | 20   | 2.0    | 80.0   | 98.3                | 94.7                    | 3.6                 | 2.6                 | 4.4 |
| 10    | 20   | 2.0    | 100.0  | 98.7                | 96.9                    | 2.0                 | 1.0                 | 4.3 |
| 12    | 20   | 0.5    | 100.0  | 85.8                | 88.7                    | 5.5                 | 5.7                 | 9.1 |
| 13    | 20   | 1.0    | 100.0  | 98.4                | 96.0                    | 1.9                 | 2.0                 | 7.1 |
| 14    | 20   | 1.5    | 100.0  | 98.4                | 96.7                    | 1.5                 | 1.6                 | 6.9 |
| 15    | 20   | 2.0    | 100.0  | 98.9                | 97.0                    | 1.4                 | 1.5                 | 5.9 |
| 16    | 20   | 3.0    | 100.0  | 97.3                | 97.6                    | 1.1                 | 1.2                 | 5.1 |

Reaction conditions: S/C=1000, [Rh]=1.60mM, toluene 3ml, 1h

<sup>a</sup>The conversion of 1-octene ; <sup>b</sup> Selectivity for aldehyde in all product; <sup>c</sup> Selectivity for octane in all product; <sup>d</sup> Selectivity for 2-octene in all product; <sup>e</sup> Molar ratio of linear to branched aldehyde. The products were analyzed by GC.

#### 4. $^1\text{H}$ , $^{13}\text{C}$ and $^{31}\text{P}$ NMR spectra

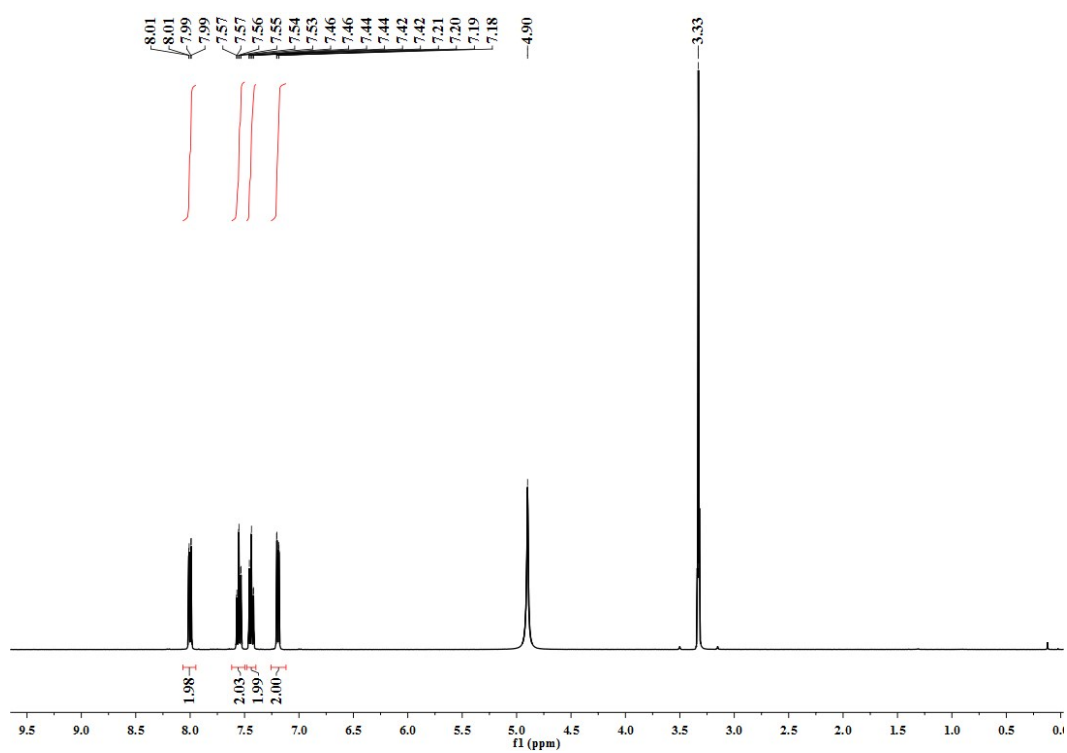

Figure S1:  $^1\text{H}$  NMR spectrum of compound **B** in  $\text{CD}_3\text{OD}$ .

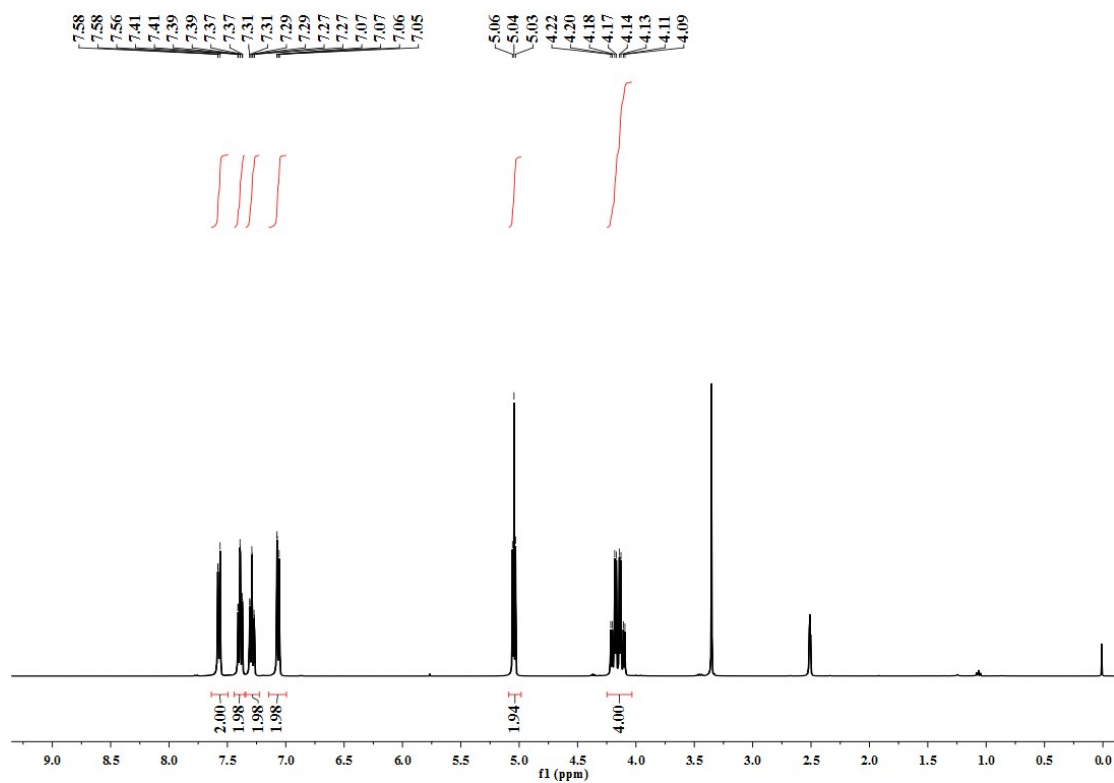

Figure S2: <sup>1</sup>H NMR spectrum of compound **C** in *d*<sub>6</sub>-DMSO.

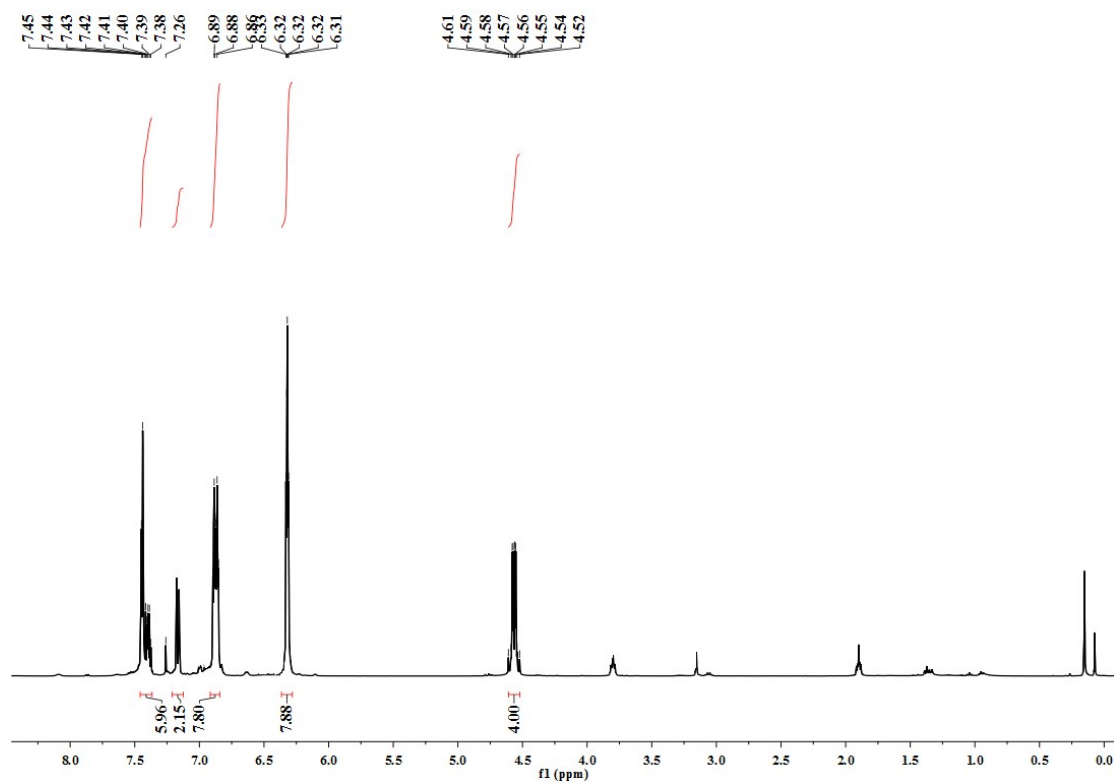

Figure S3: <sup>1</sup>H NMR spectrum of ligand **L1** in CDCl<sub>3</sub>.

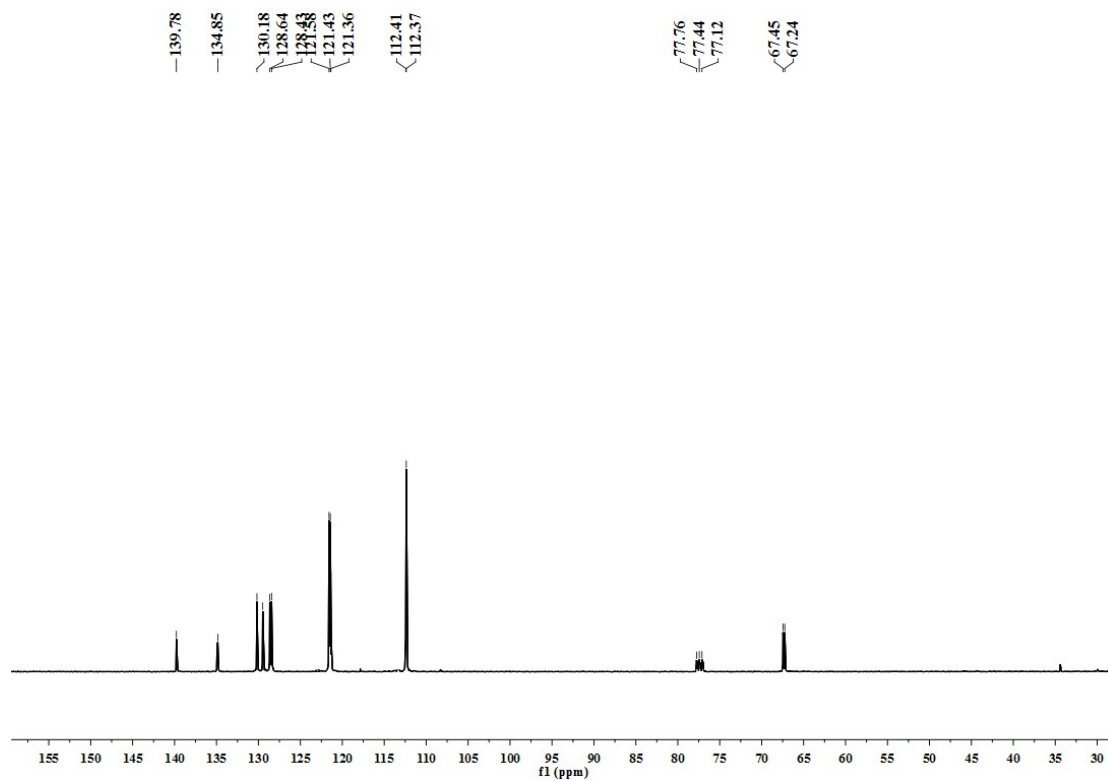

Figure S4:  $^{13}\text{C}$  NMR spectrum of ligand **L1** in  $\text{CDCl}_3$ .

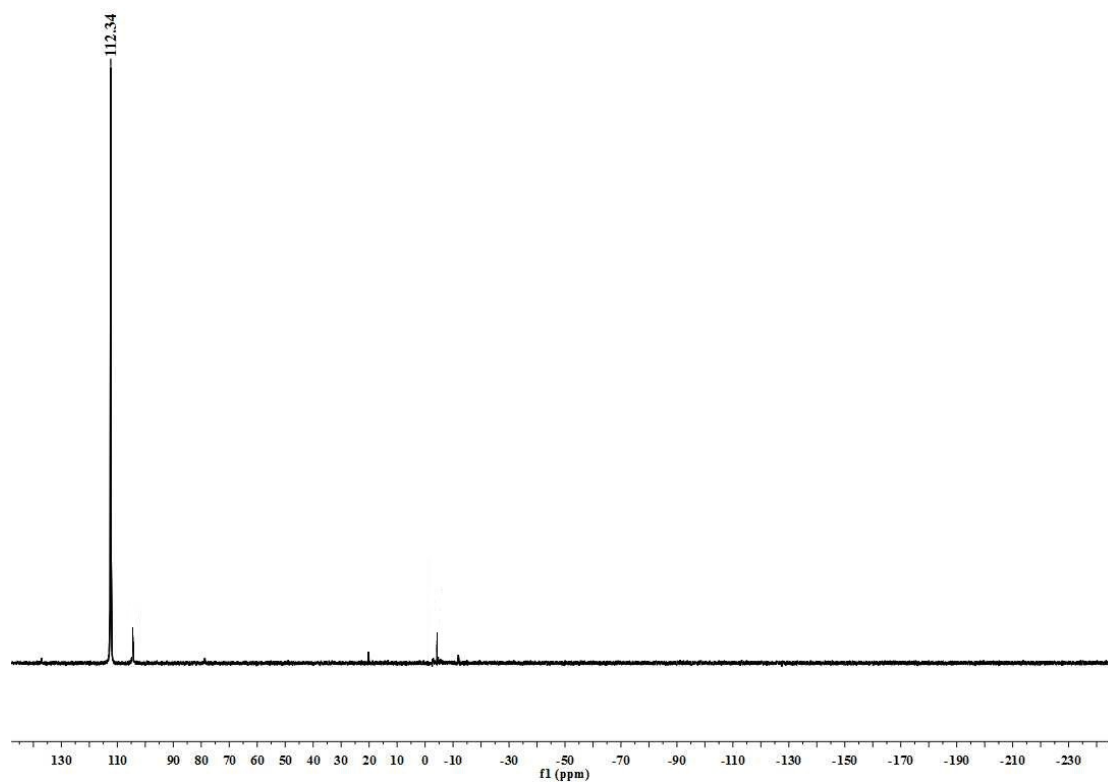

Figure S5:  $^{31}\text{P}$  NMR spectrum of ligand **L1** in  $\text{CDCl}_3$ .



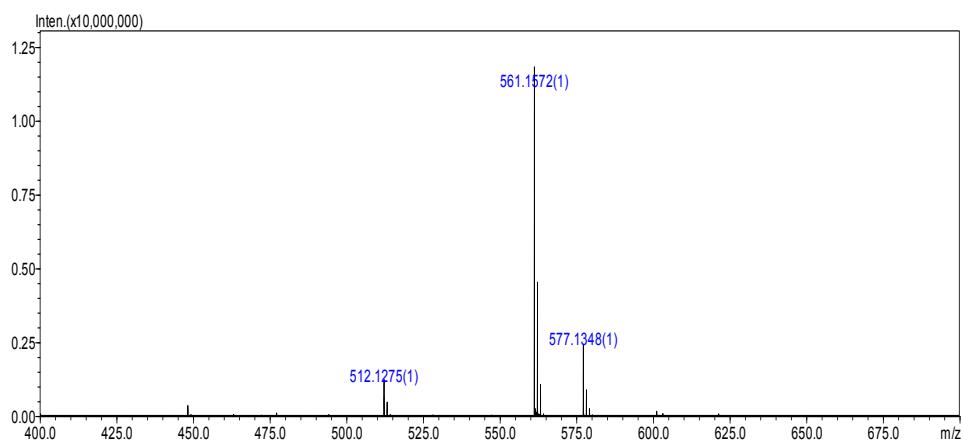

Figure S6: HRMS [M+ Na<sup>+</sup>] of ligand L1

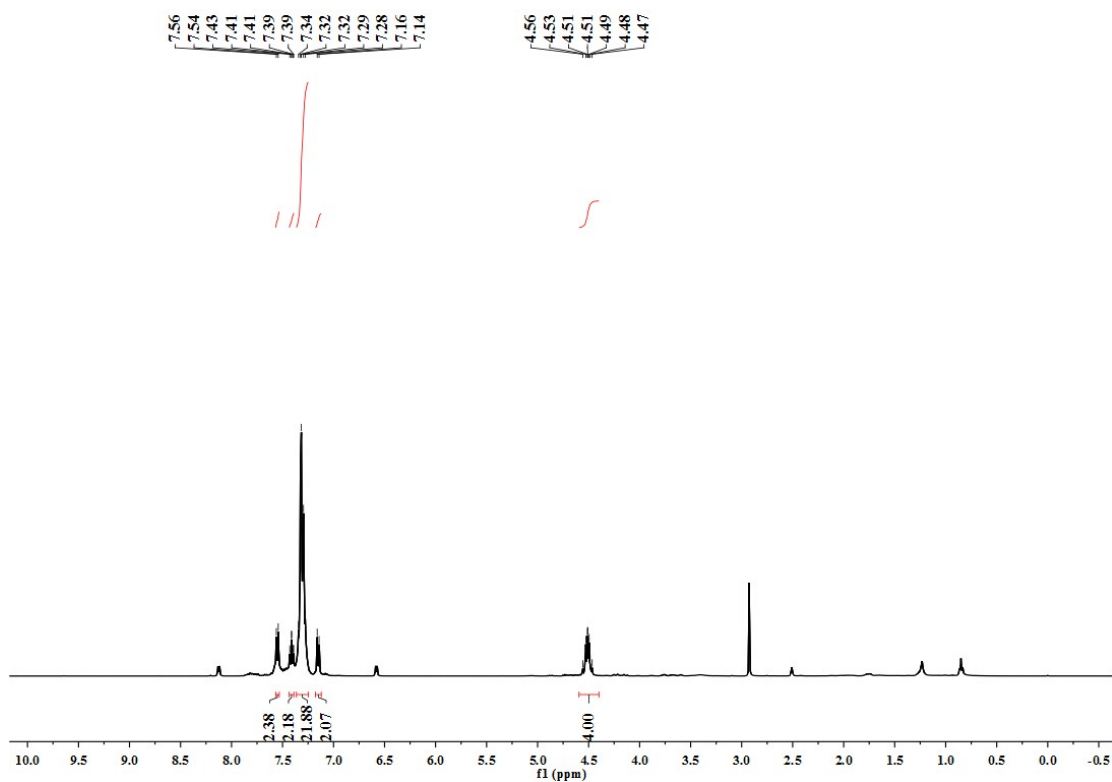

Figure S7: <sup>1</sup>H NMR spectrum of ligand L2 in DMSO.

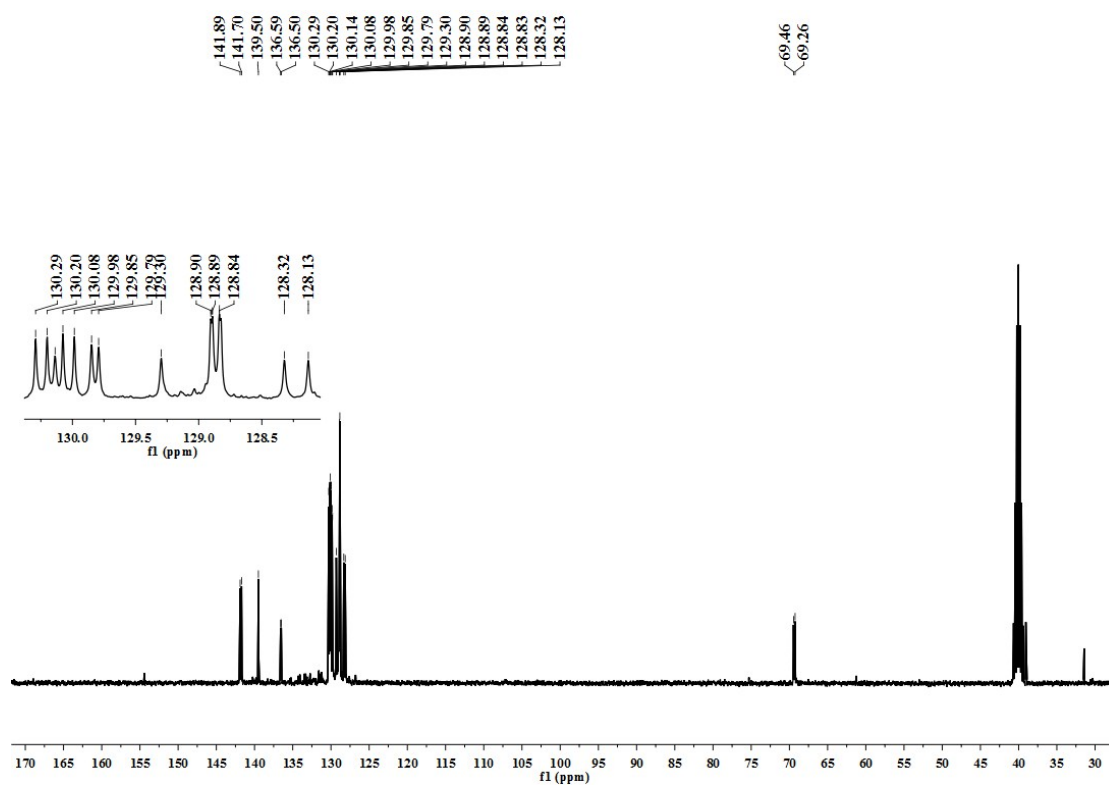

Figure S8:  $^{13}\text{C}$  NMR spectrum of ligand L2 in DMSO.

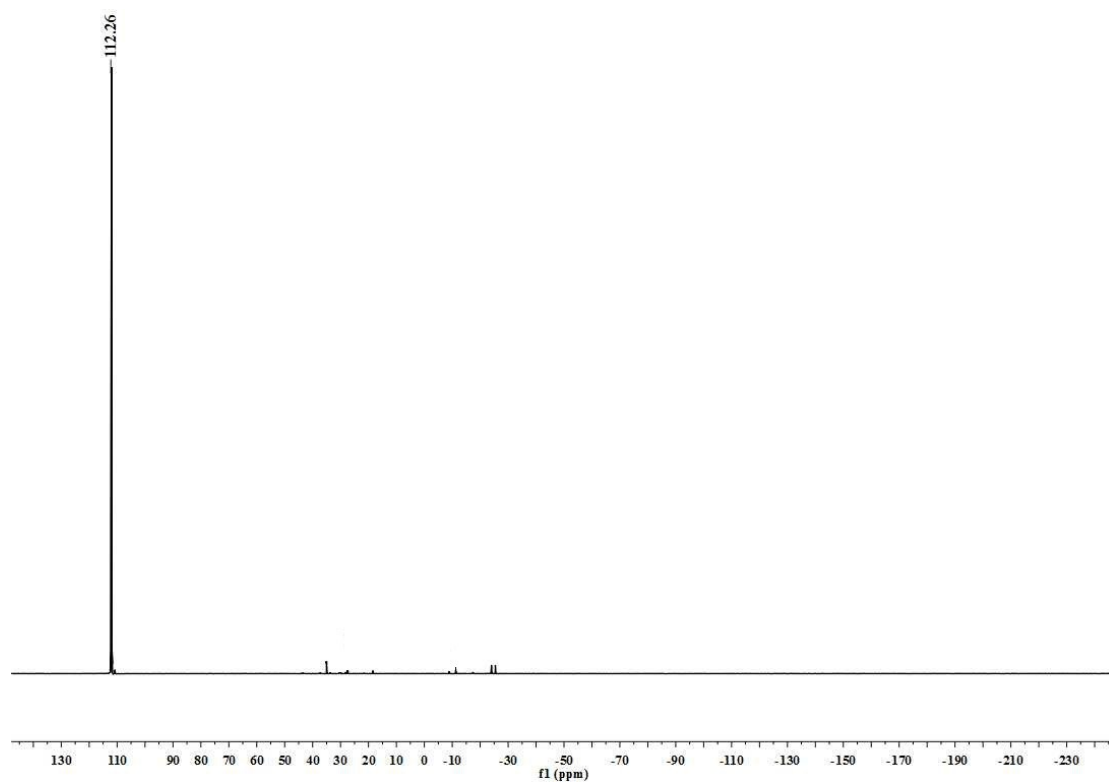

Figure S9:  $^{31}\text{P}$  NMR spectrum of ligand L2 in DMSO.

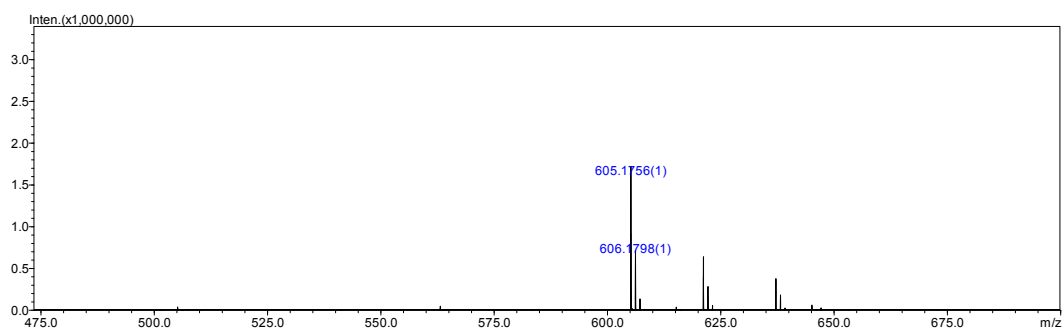Figure S10: HRMS [M+ Na<sup>+</sup>] of ligand L2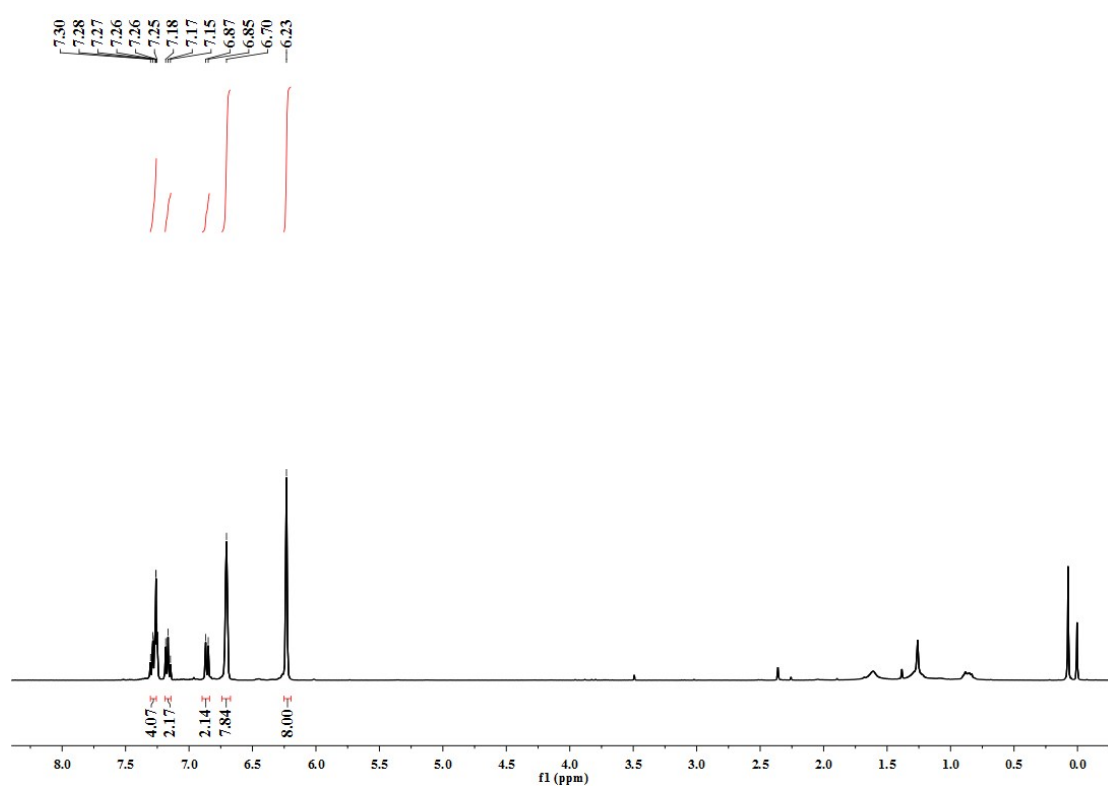Figure S11: <sup>1</sup>H NMR spectrum of ligand L3 in CDCl<sub>3</sub>.

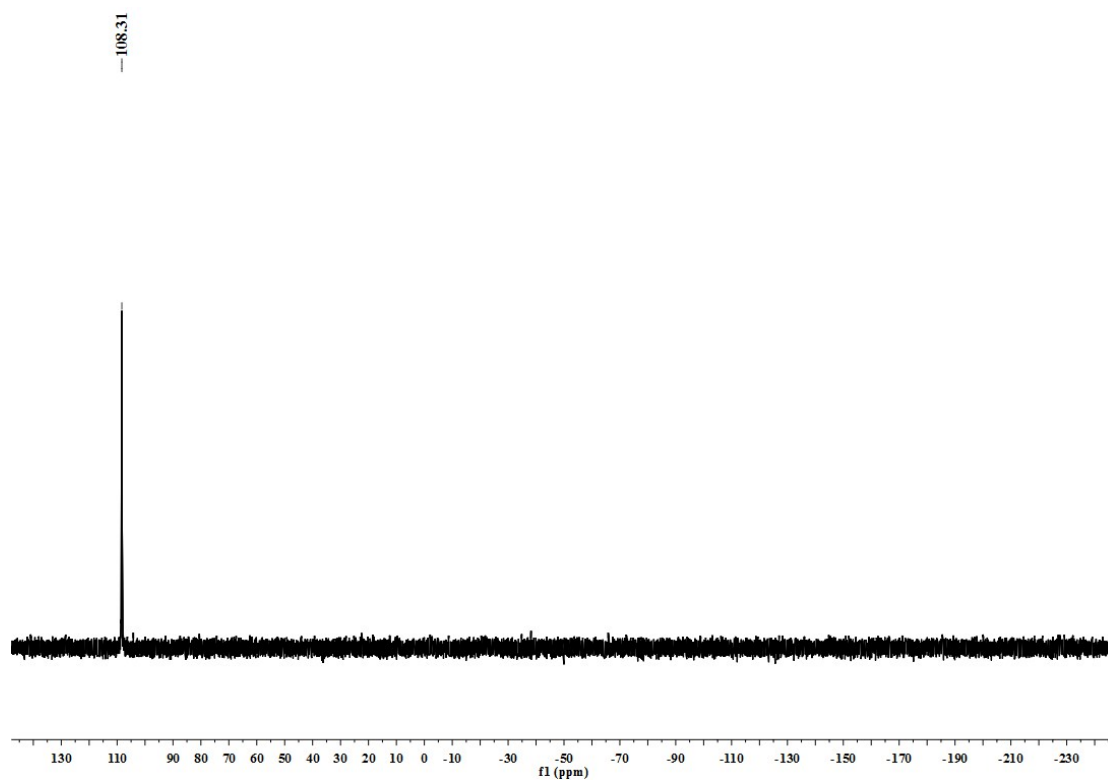

Figure S12: <sup>31</sup>P NMR spectrum of ligand L3 in CDCl<sub>3</sub>.

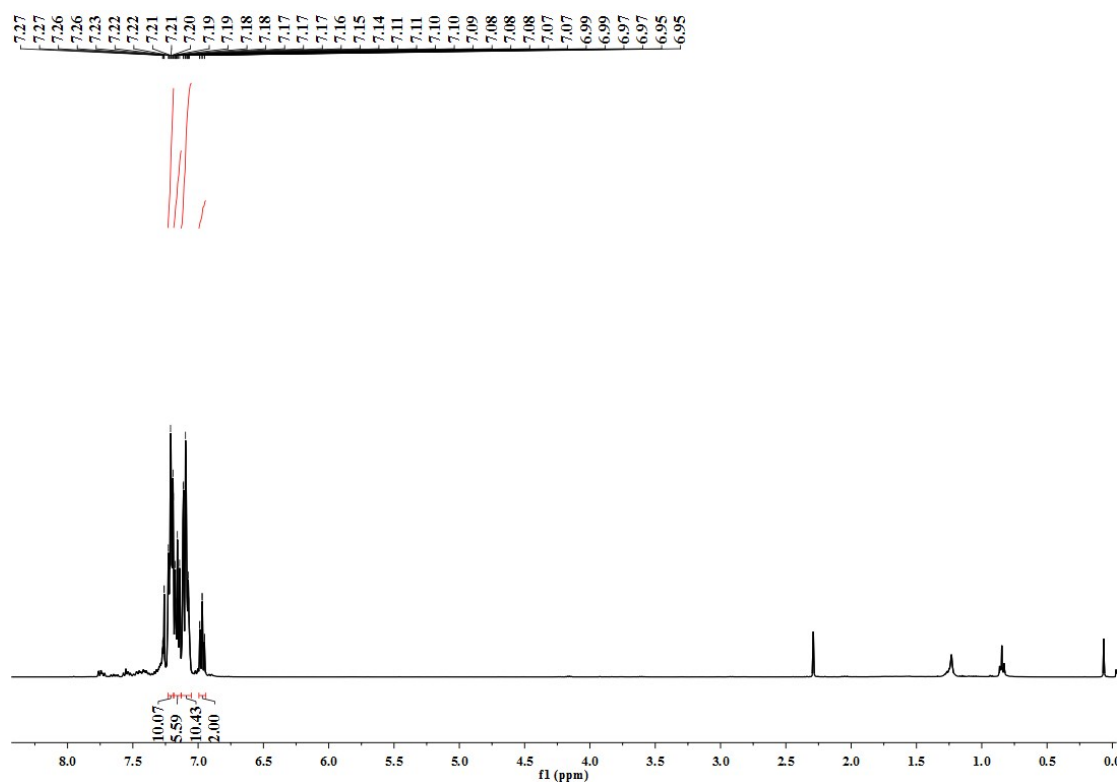

Figure S13: <sup>1</sup>H NMR spectrum of ligand L4 in CDCl<sub>3</sub>.

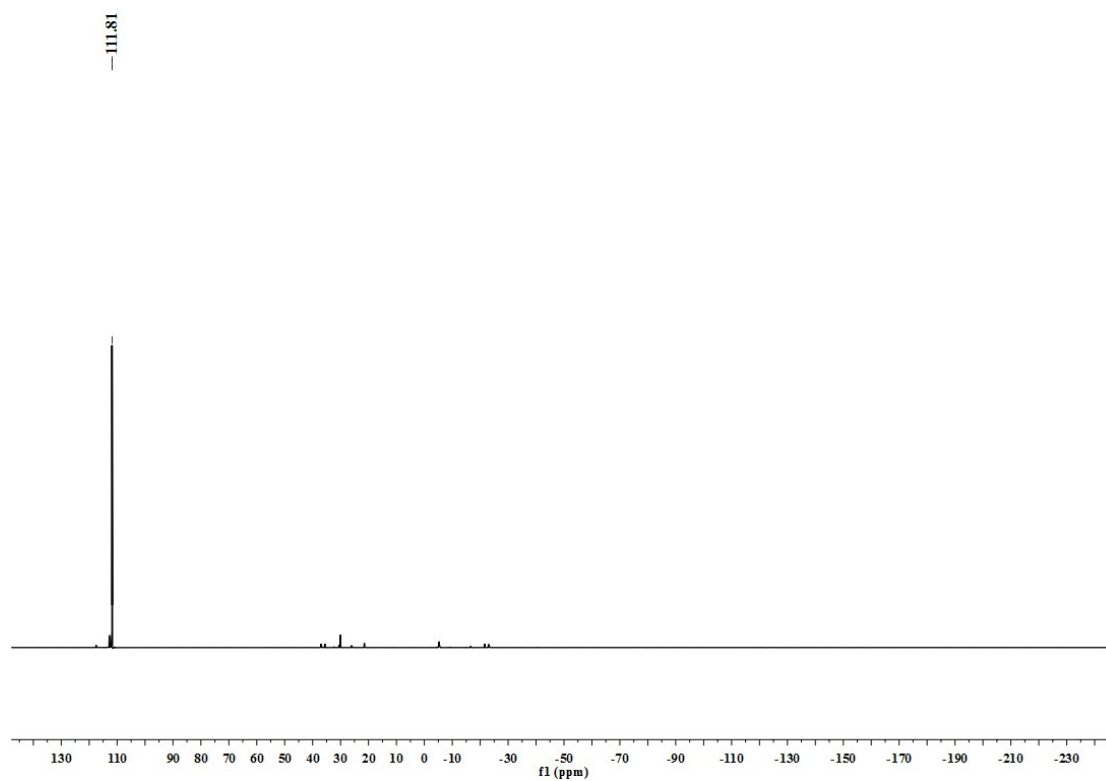

Figure S14: <sup>31</sup>P NMR spectrum of ligand L4 in CDCl<sub>3</sub>

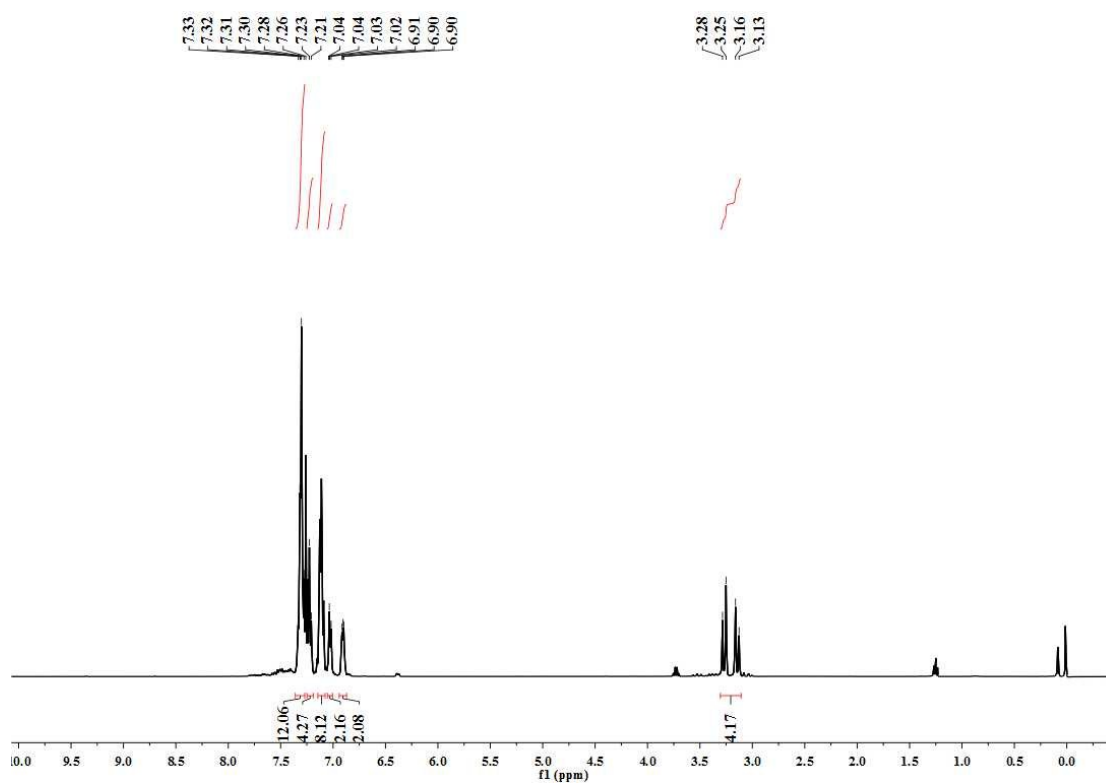

Figure S15: <sup>1</sup>H NMR spectrum of ligand L5 in CDCl<sub>3</sub>

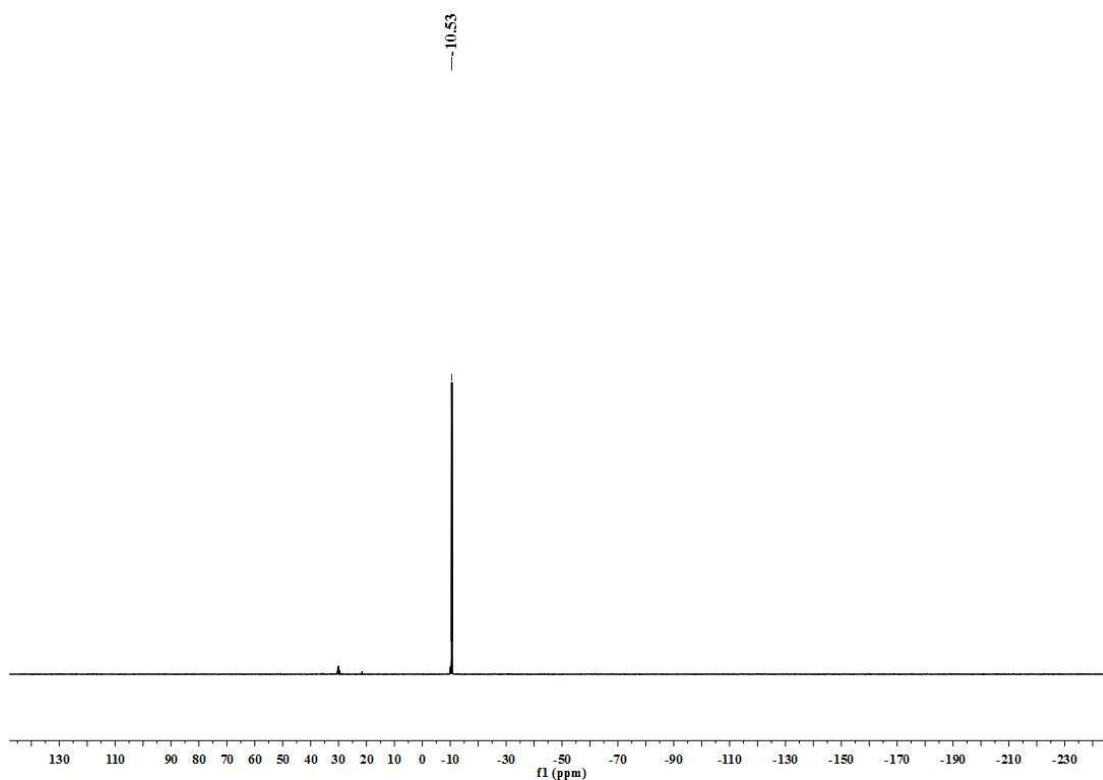

Figure S16:  $^{31}\text{P}$  NMR spectrum of ligand **L5** in  $\text{CDCl}_3$

## 5. The calculated bite angle of the major intermediates

The DFT calculation was performed using Gaussain 09 program<sup>3</sup>  
M06-optimized coordinates of various species

### L1 system

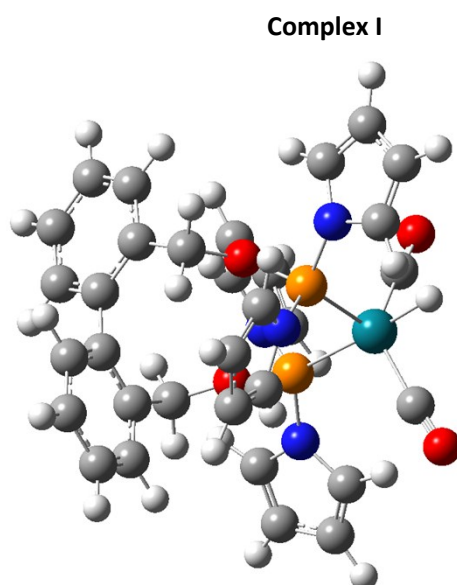

| Center Number | Atomic Number | Atomic Type | Coordinates (Angstroms) |           |          |
|---------------|---------------|-------------|-------------------------|-----------|----------|
|               |               |             | X                       | Y         | Z        |
| 1             | 6             | 0           | 2.400161                | -2.313691 | 3.843543 |
| 2             | 6             | 0           | 2.105957                | -3.546436 | 3.267626 |
| 3             | 6             | 0           | 2.064212                | -3.672252 | 1.884423 |

|    |    |   |           |           |           |
|----|----|---|-----------|-----------|-----------|
| 4  | 6  | 0 | 2.297272  | -2.573342 | 1.051283  |
| 5  | 6  | 0 | 2.583818  | -1.329036 | 1.634449  |
| 6  | 6  | 0 | 2.636095  | -1.217280 | 3.025476  |
| 7  | 6  | 0 | 2.281332  | -2.767237 | -0.425402 |
| 8  | 6  | 0 | 3.500882  | -2.885895 | -1.098329 |
| 9  | 6  | 0 | 3.547817  | -3.102930 | -2.469995 |
| 10 | 6  | 0 | 2.365635  | -3.206174 | -3.195231 |
| 11 | 6  | 0 | 1.148909  | -3.084041 | -2.537885 |
| 12 | 6  | 0 | 1.089458  | -2.869994 | -1.160076 |
| 13 | 8  | 0 | 1.385009  | 0.541080  | 0.894888  |
| 14 | 8  | 0 | -0.508725 | -1.240953 | -0.583404 |
| 15 | 15 | 0 | -1.844623 | -0.471875 | -0.086388 |
| 16 | 7  | 0 | -3.163564 | -1.282715 | -0.851410 |
| 17 | 7  | 0 | -2.066070 | -1.135709 | 1.496483  |
| 18 | 15 | 0 | 0.843596  | 1.697606  | -0.113404 |
| 19 | 7  | 0 | 1.721130  | 3.071411  | 0.497263  |
| 20 | 6  | 0 | 1.981538  | 3.265567  | 1.846474  |
| 21 | 6  | 0 | 2.286261  | 4.585261  | 2.042436  |
| 22 | 6  | 0 | 2.177255  | 5.240484  | 0.783503  |
| 23 | 6  | 0 | 1.810266  | 4.299108  | -0.139559 |
| 24 | 7  | 0 | 1.783698  | 1.464663  | -1.551863 |
| 25 | 6  | 0 | 1.379236  | 0.572130  | -2.538707 |
| 26 | 6  | 0 | 2.425794  | 0.364016  | -3.391305 |
| 27 | 6  | 0 | 3.522847  | 1.142832  | -2.921201 |
| 28 | 6  | 0 | 3.115374  | 1.796368  | -1.792431 |
| 29 | 6  | 0 | -3.279862 | -1.201766 | 2.176041  |
| 30 | 6  | 0 | -3.018347 | -1.318038 | 3.512105  |
| 31 | 6  | 0 | -1.603673 | -1.287848 | 3.678698  |
| 32 | 6  | 0 | -1.043492 | -1.153274 | 2.439712  |
| 33 | 6  | 0 | -3.563155 | -2.610428 | -0.692674 |
| 34 | 6  | 0 | -4.554575 | -2.871977 | -1.594765 |
| 35 | 6  | 0 | -4.782706 | -1.682091 | -2.344537 |
| 36 | 6  | 0 | -3.924558 | -0.730232 | -1.875917 |
| 37 | 1  | 0 | 2.440729  | -2.207739 | 4.926032  |
| 38 | 1  | 0 | 1.914604  | -4.414077 | 3.896444  |
| 39 | 1  | 0 | 1.850132  | -4.639150 | 1.427892  |
| 40 | 1  | 0 | 2.845308  | -0.240044 | 3.464140  |
| 41 | 1  | 0 | 4.424271  | -2.811774 | -0.523367 |
| 42 | 1  | 0 | 4.510017  | -3.196253 | -2.970648 |
| 43 | 1  | 0 | 2.391689  | -3.378495 | -4.269866 |
| 44 | 1  | 0 | 0.214975  | -3.147860 | -3.098145 |
| 45 | 1  | 0 | 1.919300  | 2.433750  | 2.538262  |
| 46 | 1  | 0 | 2.568376  | 5.035731  | 2.986993  |
| 47 | 1  | 0 | 2.361646  | 6.288722  | 0.578576  |
| 48 | 1  | 0 | 1.611995  | 4.381731  | -1.202496 |
| 49 | 1  | 0 | 0.382491  | 0.145636  | -2.508233 |
| 50 | 1  | 0 | 2.408811  | -0.271101 | -4.269260 |
| 51 | 1  | 0 | 4.502732  | 1.227083  | -3.377807 |
| 52 | 1  | 0 | 3.633728  | 2.484582  | -1.136601 |
| 53 | 1  | 0 | -4.216756 | -1.176707 | 1.632902  |
| 54 | 1  | 0 | -3.763002 | -1.427582 | 4.291900  |
| 55 | 1  | 0 | -1.058530 | -1.368272 | 4.612217  |
| 56 | 1  | 0 | -0.010789 | -1.049269 | 2.125379  |
| 57 | 1  | 0 | -3.127069 | -3.225556 | 0.084917  |
| 58 | 1  | 0 | -5.074715 | -3.817075 | -1.702011 |
| 59 | 1  | 0 | -5.511434 | -1.540630 | -3.133758 |
| 60 | 1  | 0 | -3.787294 | 0.305073  | -2.161242 |
| 61 | 45 | 0 | -1.525472 | 1.866306  | -0.246596 |
| 62 | 6  | 0 | -2.168587 | 2.240245  | -2.048278 |
| 63 | 8  | 0 | -2.524737 | 2.542150  | -3.102070 |
| 64 | 6  | 0 | -2.291876 | 2.257319  | 1.520123  |
| 65 | 8  | 0 | -2.721293 | 2.555932  | 2.543145  |
| 66 | 6  | 0 | 2.681681  | -0.079809 | 0.814930  |
| 67 | 1  | 0 | 2.921346  | -0.288434 | -0.236357 |
| 68 | 1  | 0 | 3.434241  | 0.616061  | 1.217385  |
| 69 | 6  | 0 | -0.252015 | -2.657282 | -0.530169 |

|    |   |   |           |           |           |
|----|---|---|-----------|-----------|-----------|
| 70 | 1 | 0 | -1.035977 | -3.180694 | -1.095949 |
| 71 | 1 | 0 | -0.288430 | -2.988768 | 0.516931  |
| 72 | 1 | 0 | -1.282880 | 3.458525  | -0.260468 |

**Complex II**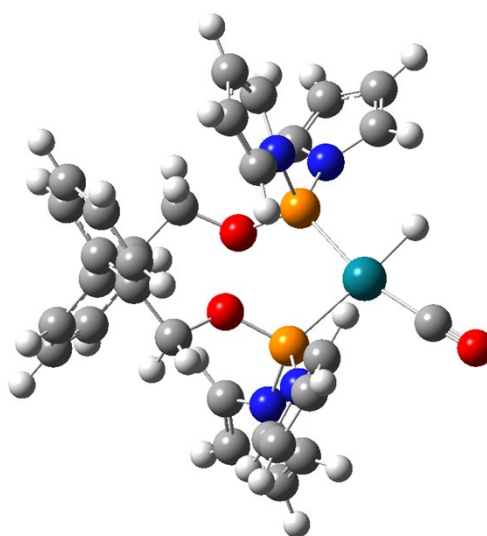

| Center Number | Atomic Number | Atomic Type | Coordinates (Angstroms) |          |           |
|---------------|---------------|-------------|-------------------------|----------|-----------|
|               |               |             | X                       | Y        | Z         |
| 1             | 6             | 0           | -0.242009               | 3.293242 | 3.703698  |
| 2             | 6             | 0           | 0.705845                | 4.118270 | 3.103209  |
| 3             | 6             | 0           | 0.804461                | 4.163028 | 1.718439  |
| 4             | 6             | 0           | -0.027216               | 3.382052 | 0.908464  |
| 5             | 6             | 0           | -0.980748               | 2.550951 | 1.515478  |
| 6             | 6             | 0           | -1.077906               | 2.521024 | 2.908944  |
| 7             | 6             | 0           | 0.124784                | 3.468697 | -0.571448 |
| 8             | 6             | 0           | -0.709440               | 4.312771 | -1.306065 |
| 9             | 6             | 0           | -0.582147               | 4.419188 | -2.687496 |



|    |    |   |           |           |           |
|----|----|---|-----------|-----------|-----------|
| 10 | 6  | 0 | 0.386861  | 3.678330  | -3.355057 |
| 11 | 6  | 0 | 1.217979  | 2.830020  | -2.632811 |
| 12 | 6  | 0 | 1.103495  | 2.723170  | -1.247957 |
| 13 | 8  | 0 | -1.505129 | 0.288608  | 1.037059  |
| 14 | 8  | 0 | 1.104255  | 0.584558  | -0.286441 |
| 15 | 15 | 0 | 1.619509  | -0.903157 | 0.102834  |
| 16 | 7  | 0 | 3.061319  | -1.088670 | -0.839814 |
| 17 | 7  | 0 | 2.364063  | -0.606957 | 1.638958  |
| 18 | 15 | 0 | -1.765275 | -0.989359 | 0.068840  |
| 19 | 7  | 0 | -3.261736 | -1.553762 | 0.716058  |
| 20 | 6  | 0 | -4.081654 | -0.880286 | 1.613748  |
| 21 | 6  | 0 | -5.274386 | -1.544327 | 1.684827  |
| 22 | 6  | 0 | -5.200936 | -2.656893 | 0.797544  |
| 23 | 6  | 0 | -3.962382 | -2.642344 | 0.219818  |
| 24 | 7  | 0 | -2.339959 | -0.296784 | -1.401475 |
| 25 | 6  | 0 | -1.488462 | 0.167144  | -2.399129 |
| 26 | 6  | 0 | -2.220245 | 0.925698  | -3.268800 |
| 27 | 6  | 0 | -3.566629 | 0.938587  | -2.799696 |
| 28 | 6  | 0 | -3.616473 | 0.195751  | -1.653839 |
| 29 | 6  | 0 | 3.224378  | -1.476690 | 2.295913  |
| 30 | 6  | 0 | 3.284223  | -1.109947 | 3.612602  |
| 31 | 6  | 0 | 2.407634  | -0.001457 | 3.789028  |
| 32 | 6  | 0 | 1.839734  | 0.274640  | 2.576351  |
| 33 | 6  | 0 | 4.323421  | -0.534143 | -0.651308 |
| 34 | 6  | 0 | 5.005998  | -0.607320 | -1.833921 |
| 35 | 6  | 0 | 4.139481  | -1.197411 | -2.799251 |
| 36 | 6  | 0 | 2.958440  | -1.477893 | -2.171015 |
| 37 | 1  | 0 | -0.328045 | 3.251820  | 4.787968  |
| 38 | 1  | 0 | 1.365283  | 4.731497  | 3.714895  |
| 39 | 1  | 0 | 1.540751  | 4.810189  | 1.241153  |
| 40 | 1  | 0 | -1.812858 | 1.858130  | 3.368223  |
| 41 | 1  | 0 | -1.469683 | 4.890305  | -0.779687 |
| 42 | 1  | 0 | -1.242337 | 5.083624  | -3.242330 |
| 43 | 1  | 0 | 0.491096  | 3.755931  | -4.435868 |
| 44 | 1  | 0 | 1.968944  | 2.225820  | -3.145105 |
| 45 | 1  | 0 | -3.710497 | -0.018118 | 2.152829  |
| 46 | 1  | 0 | -6.108177 | -1.277453 | 2.324054  |
| 47 | 1  | 0 | -5.971648 | -3.397590 | 0.619309  |
| 48 | 1  | 0 | -3.498835 | -3.301362 | -0.505637 |
| 49 | 1  | 0 | -0.431940 | -0.079176 | -2.375981 |
| 50 | 1  | 0 | -1.834724 | 1.414927  | -4.156228 |
| 51 | 1  | 0 | -4.411547 | 1.428028  | -3.270766 |
| 52 | 1  | 0 | -4.440771 | -0.057923 | -0.996176 |
| 53 | 1  | 0 | 3.725988  | -2.269483 | 1.751891  |
| 54 | 1  | 0 | 3.900304  | -1.579477 | 4.370671  |
| 55 | 1  | 0 | 2.218290  | 0.540086  | 4.709021  |
| 56 | 1  | 0 | 1.089703  | 1.003701  | 2.289148  |
| 57 | 1  | 0 | 4.612117  | -0.149005 | 0.319206  |
| 58 | 1  | 0 | 6.028358  | -0.283307 | -1.992827 |
| 59 | 1  | 0 | 4.372433  | -1.412733 | -3.835576 |
| 60 | 1  | 0 | 2.040053  | -1.930886 | -2.532554 |
| 61 | 45 | 0 | -0.034635 | -2.480334 | -0.197397 |
| 62 | 6  | 0 | 1.044561  | -4.036853 | -0.471836 |
| 63 | 8  | 0 | 1.648235  | -5.001067 | -0.634980 |
| 64 | 6  | 0 | -1.867538 | 1.644347  | 0.716180  |
| 65 | 1  | 0 | -1.757738 | 1.821301  | -0.361334 |
| 66 | 1  | 0 | -2.927232 | 1.793324  | 0.977086  |
| 67 | 6  | 0 | 1.947596  | 1.725693  | -0.520855 |
| 68 | 1  | 0 | 2.812287  | 1.426517  | -1.130725 |
| 69 | 1  | 0 | 2.314337  | 2.098457  | 0.446632  |
| 70 | 1  | 0 | -1.257842 | -3.530183 | -0.487273 |

**Complex III**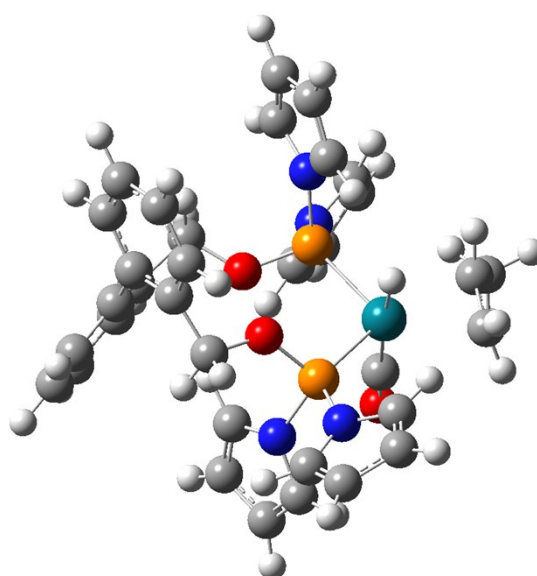

| Center Number | Atomic Number | Atomic Type | Coordinates (Angstroms) |           |           |
|---------------|---------------|-------------|-------------------------|-----------|-----------|
|               |               |             | X                       | Y         | Z         |
| 1             | 6             | 0           | -2.834828               | -1.818639 | 3.845292  |
| 2             | 6             | 0           | -3.978761               | -1.265434 | 3.279589  |
| 3             | 6             | 0           | -4.115507               | -1.220414 | 1.896825  |
| 4             | 6             | 0           | -3.115595               | -1.711506 | 1.052448  |
| 5             | 6             | 0           | -1.959136               | -2.265963 | 1.627461  |
| 6             | 6             | 0           | -1.833836               | -2.310947 | 3.016801  |
| 7             | 6             | 0           | -3.336009               | -1.677576 | -0.420025 |

|    |    |   |           |           |           |
|----|----|---|-----------|-----------|-----------|
| 8  | 6  | 0 | -3.652586 | -2.874343 | -1.070713 |
| 9  | 6  | 0 | -3.924316 | -2.905871 | -2.432886 |
| 10 | 6  | 0 | -3.896534 | -1.727360 | -3.170174 |
| 11 | 6  | 0 | -3.579156 | -0.533953 | -2.535636 |
| 12 | 6  | 0 | -3.293959 | -0.490285 | -1.170118 |
| 13 | 8  | 0 | -0.059641 | -1.413855 | 0.588942  |
| 14 | 15 | 0 | -0.339684 | 1.927677  | -0.231776 |
| 15 | 7  | 0 | -0.910353 | 3.405758  | -0.935813 |
| 16 | 7  | 0 | -0.883919 | 2.241077  | 1.395778  |
| 17 | 15 | 0 | 1.316774  | -1.194889 | -0.242672 |
| 18 | 7  | 0 | 2.390436  | -2.136534 | 0.770548  |
| 19 | 6  | 0 | 2.428309  | -1.926783 | 2.141314  |
| 20 | 6  | 0 | 3.612868  | -2.415684 | 2.624231  |
| 21 | 6  | 0 | 4.347372  | -2.923002 | 1.515901  |
| 22 | 6  | 0 | 3.589838  | -2.719664 | 0.392267  |
| 23 | 7  | 0 | 1.225463  | -2.305330 | -1.565979 |
| 24 | 6  | 0 | 0.934202  | -1.894066 | -2.861522 |
| 25 | 6  | 0 | 0.769690  | -3.000915 | -3.643880 |
| 26 | 6  | 0 | 0.953981  | -4.143819 | -2.812840 |
| 27 | 6  | 0 | 1.222970  | -3.699265 | -1.549345 |
| 28 | 6  | 0 | -0.649885 | 3.419377  | 2.095711  |
| 29 | 6  | 0 | -0.744720 | 3.155127  | 3.434648  |
| 30 | 6  | 0 | -1.015533 | 1.764758  | 3.578530  |
| 31 | 6  | 0 | -1.073694 | 1.224013  | 2.323438  |
| 32 | 6  | 0 | -2.102708 | 4.086535  | -0.709633 |
| 33 | 6  | 0 | -2.191256 | 5.108540  | -1.613635 |
| 34 | 6  | 0 | -1.027849 | 5.060964  | -2.435096 |
| 35 | 6  | 0 | -0.264487 | 4.013147  | -2.002723 |
| 36 | 1  | 0 | -2.720635 | -1.862288 | 4.926907  |
| 37 | 1  | 0 | -4.770124 | -0.872712 | 3.915498  |
| 38 | 1  | 0 | -5.017470 | -0.800588 | 1.450262  |
| 39 | 1  | 0 | -0.920374 | -2.725850 | 3.446638  |
| 40 | 1  | 0 | -3.691798 | -3.792575 | -0.483586 |
| 41 | 1  | 0 | -4.165948 | -3.851314 | -2.915490 |
| 42 | 1  | 0 | -4.114707 | -1.738797 | -4.236388 |
| 43 | 1  | 0 | -3.531625 | 0.392832  | -3.108435 |
| 44 | 1  | 0 | 1.601272  | -1.425220 | 2.636409  |
| 45 | 1  | 0 | 3.917373  | -2.423941 | 3.664314  |
| 46 | 1  | 0 | 5.321054  | -3.398527 | 1.545031  |
| 47 | 1  | 0 | 3.781554  | -2.953183 | -0.648959 |
| 48 | 1  | 0 | 0.875141  | -0.835313 | -3.086293 |
| 49 | 1  | 0 | 0.544427  | -2.997601 | -4.703816 |
| 50 | 1  | 0 | 0.905018  | -5.183383 | -3.117004 |
| 51 | 1  | 0 | 1.438609  | -4.237085 | -0.634393 |
| 52 | 1  | 0 | -0.453064 | 4.342756  | 1.563693  |
| 53 | 1  | 0 | -0.645411 | 3.885417  | 4.229456  |
| 54 | 1  | 0 | -1.168837 | 1.221384  | 4.504339  |
| 55 | 1  | 0 | -1.228611 | 0.202309  | 1.994967  |
| 56 | 1  | 0 | -2.752702 | 3.798252  | 0.107842  |
| 57 | 1  | 0 | -3.000768 | 5.827221  | -1.676435 |
| 58 | 1  | 0 | -0.779652 | 5.732390  | -3.248766 |
| 59 | 1  | 0 | 0.687340  | 3.620254  | -2.341773 |
| 60 | 45 | 0 | 1.800209  | 1.090365  | -0.508788 |
| 61 | 6  | 0 | 2.370286  | 1.435799  | 1.348954  |
| 62 | 8  | 0 | 2.688921  | 1.678528  | 2.425574  |
| 63 | 1  | 0 | 1.344594  | 0.972774  | -2.060018 |
| 64 | 6  | 0 | -0.775437 | -2.640234 | 0.789027  |
| 65 | 6  | 0 | -2.824213 | 0.811271  | -0.591492 |
| 66 | 8  | 0 | -1.397077 | 0.808395  | -0.729120 |
| 67 | 1  | 0 | -1.060802 | -3.053493 | -0.188119 |
| 68 | 1  | 0 | -0.130972 | -3.363930 | 1.311081  |
| 69 | 1  | 0 | -3.092905 | 0.930036  | 0.467335  |
| 70 | 1  | 0 | -3.239077 | 1.659665  | -1.155977 |
| 71 | 6  | 0 | 3.399626  | 2.367329  | -1.406402 |
| 72 | 6  | 0 | 3.889434  | 1.058510  | -1.322006 |
| 73 | 6  | 0 | 4.931106  | 0.646307  | -0.321438 |

|    |   |   |          |           |           |
|----|---|---|----------|-----------|-----------|
| 74 | 1 | 0 | 3.022043 | 2.756605  | -2.349975 |
| 75 | 1 | 0 | 3.737419 | 3.118746  | -0.690890 |
| 76 | 1 | 0 | 4.974961 | 1.352623  | 0.519209  |
| 77 | 1 | 0 | 4.745876 | -0.355774 | 0.091238  |
| 78 | 1 | 0 | 5.928049 | 0.628686  | -0.788607 |
| 79 | 1 | 0 | 3.827928 | 0.436339  | -2.219241 |

Complex IV

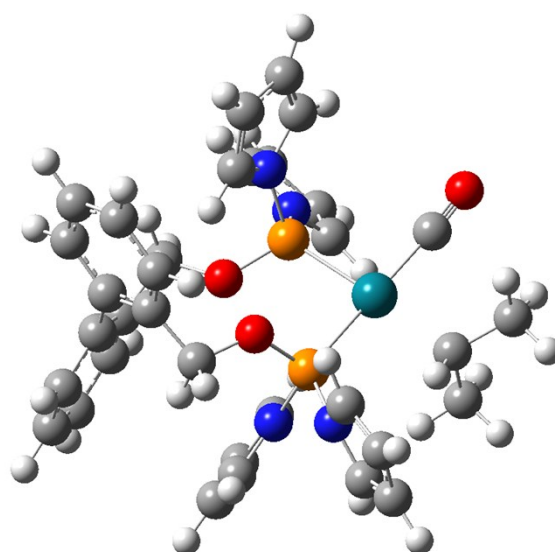

| Center Number | Atomic Number | Atomic Type | Coordinates (Angstroms) |           |           |
|---------------|---------------|-------------|-------------------------|-----------|-----------|
|               |               |             | X                       | Y         | Z         |
| 1             | 6             | 0           | -3.510285               | -0.303303 | 3.830363  |
| 2             | 6             | 0           | -4.449474               | 0.383169  | 3.065720  |
| 3             | 6             | 0           | -4.475057               | 0.215409  | 1.686572  |
| 4             | 6             | 0           | -3.560966               | -0.625016 | 1.043186  |
| 5             | 6             | 0           | -2.609437               | -1.310176 | 1.816112  |
| 6             | 6             | 0           | -2.598995               | -1.141952 | 3.202131  |
| 7             | 6             | 0           | -3.660204               | -0.807478 | -0.431785 |
| 8             | 6             | 0           | -4.286256               | -1.955511 | -0.923289 |
| 9             | 6             | 0           | -4.422164               | -2.170660 | -2.290101 |
| 10            | 6             | 0           | -3.931166               | -1.230828 | -3.188380 |

|    |    |   |           |           |           |
|----|----|---|-----------|-----------|-----------|
| 11 | 6  | 0 | -3.306832 | -0.085587 | -2.709596 |
| 12 | 6  | 0 | -3.166499 | 0.142633  | -1.341219 |
| 13 | 8  | 0 | -0.345970 | -1.314506 | 1.156803  |
| 14 | 8  | 0 | -1.078078 | 0.864231  | -0.552807 |
| 15 | 15 | 0 | 0.221487  | 1.746590  | -0.151256 |
| 16 | 7  | 0 | 0.252159  | 3.054505  | -1.287753 |
| 17 | 7  | 0 | -0.395989 | 2.647255  | 1.200965  |
| 18 | 15 | 0 | 0.899805  | -1.489332 | 0.139814  |
| 19 | 7  | 0 | 1.512332  | -3.017385 | 0.694554  |
| 20 | 6  | 0 | 1.708716  | -3.281791 | 2.044725  |
| 21 | 6  | 0 | 2.554465  | -4.350504 | 2.158564  |
| 22 | 6  | 0 | 2.924207  | -4.746139 | 0.841936  |
| 23 | 6  | 0 | 2.294025  | -3.905271 | -0.033550 |
| 24 | 7  | 0 | 0.277074  | -2.034805 | -1.372809 |
| 25 | 6  | 0 | 0.310118  | -1.249908 | -2.521625 |
| 26 | 6  | 0 | -0.325418 | -1.918862 | -3.526108 |
| 27 | 6  | 0 | -0.773862 | -3.163841 | -2.995423 |
| 28 | 6  | 0 | -0.395190 | -3.217083 | -1.684855 |
| 29 | 6  | 0 | 0.142422  | 3.835734  | 1.679080  |
| 30 | 6  | 0 | -0.243346 | 3.990310  | 2.982234  |
| 31 | 6  | 0 | -1.014060 | 2.847265  | 3.340050  |
| 32 | 6  | 0 | -1.072110 | 2.029738  | 2.245382  |
| 33 | 6  | 0 | -0.644029 | 4.106163  | -1.451294 |
| 34 | 6  | 0 | -0.301139 | 4.791702  | -2.583421 |
| 35 | 6  | 0 | 0.835575  | 4.147379  | -3.152032 |
| 36 | 6  | 0 | 1.152470  | 3.090593  | -2.346037 |
| 37 | 1  | 0 | -3.486262 | -0.182161 | 4.911757  |
| 38 | 1  | 0 | -5.168336 | 1.045719  | 3.544383  |
| 39 | 1  | 0 | -5.218159 | 0.738708  | 1.084232  |
| 40 | 1  | 0 | -1.843726 | -1.668947 | 3.787198  |
| 41 | 1  | 0 | -4.673874 | -2.685125 | -0.211395 |
| 42 | 1  | 0 | -4.912604 | -3.073091 | -2.651314 |
| 43 | 1  | 0 | -4.026533 | -1.391108 | -4.260973 |
| 44 | 1  | 0 | -2.901645 | 0.646756  | -3.408984 |
| 45 | 1  | 0 | 1.219301  | -2.673619 | 2.796894  |
| 46 | 1  | 0 | 2.869250  | -4.811450 | 3.087638  |
| 47 | 1  | 0 | 3.574084  | -5.569449 | 0.569333  |
| 48 | 1  | 0 | 2.309517  | -3.861353 | -1.116051 |
| 49 | 1  | 0 | 0.796776  | -0.279902 | -2.500421 |
| 50 | 1  | 0 | -0.454183 | -1.560716 | -4.541007 |
| 51 | 1  | 0 | -1.313288 | -3.940167 | -3.526391 |
| 52 | 1  | 0 | -0.497738 | -4.001603 | -0.944950 |
| 53 | 1  | 0 | 0.737565  | 4.469306  | 1.031370  |
| 54 | 1  | 0 | -0.010495 | 4.841640  | 3.611450  |
| 55 | 1  | 0 | -1.482572 | 2.654245  | 4.298676  |
| 56 | 1  | 0 | -1.518539 | 1.051006  | 2.105204  |
| 57 | 1  | 0 | -1.420308 | 4.283172  | -0.716725 |
| 58 | 1  | 0 | -0.803010 | 5.674833  | -2.962530 |
| 59 | 1  | 0 | 1.368553  | 4.441344  | -4.048608 |
| 60 | 1  | 0 | 1.943993  | 2.350004  | -2.405094 |
| 61 | 45 | 0 | 2.159155  | 0.484193  | 0.082881  |
| 62 | 6  | 0 | 3.259187  | 2.024490  | 0.339069  |
| 63 | 8  | 0 | 3.864600  | 2.987905  | 0.516825  |
| 64 | 6  | 0 | -1.528718 | -2.132257 | 1.184809  |
| 65 | 1  | 0 | -1.797373 | -2.427088 | 0.163078  |
| 66 | 1  | 0 | -1.311358 | -3.038202 | 1.770937  |
| 67 | 6  | 0 | -2.392181 | 1.338473  | -0.876523 |
| 68 | 1  | 0 | -2.319633 | 2.091167  | -1.675120 |
| 69 | 1  | 0 | -2.829485 | 1.813136  | 0.014227  |
| 70 | 6  | 0 | 4.266090  | -1.107339 | -1.231387 |
| 71 | 6  | 0 | 3.923561  | -0.746947 | 0.205014  |
| 72 | 6  | 0 | 5.133059  | -0.172379 | 0.921456  |
| 73 | 1  | 0 | 5.112763  | -1.818311 | -1.267086 |
| 74 | 1  | 0 | 4.568879  | -0.218084 | -1.805554 |
| 75 | 1  | 0 | 3.428860  | -1.573764 | -1.772749 |
| 76 | 1  | 0 | 5.551744  | 0.697065  | 0.392580  |

|    |   |   |          |           |          |
|----|---|---|----------|-----------|----------|
| 77 | 1 | 0 | 4.899706 | 0.141432  | 1.947375 |
| 78 | 1 | 0 | 5.938775 | -0.925878 | 0.982714 |
| 79 | 1 | 0 | 3.625553 | -1.656426 | 0.747984 |

Complex V

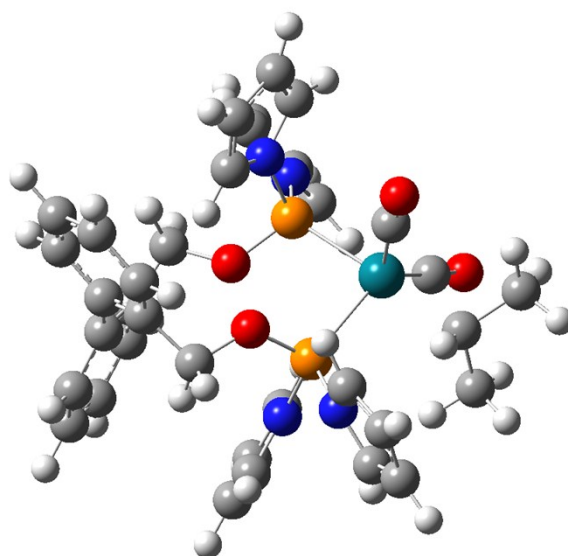

| Center Number | Atomic Number | Atomic Type | Coordinates (Angstroms) |           |           |
|---------------|---------------|-------------|-------------------------|-----------|-----------|
|               |               |             | X                       | Y         | Z         |
| 1             | 6             | 0           | -3.535203               | -0.935212 | 3.833872  |
| 2             | 6             | 0           | -4.532664               | -0.319552 | 3.083986  |
| 3             | 6             | 0           | -4.514323               | -0.413444 | 1.697337  |
| 4             | 6             | 0           | -3.500915               | -1.110239 | 1.031988  |
| 5             | 6             | 0           | -2.493517               | -1.728128 | 1.791733  |
| 6             | 6             | 0           | -2.524163               | -1.631847 | 3.183911  |
| 7             | 6             | 0           | -3.557390               | -1.215843 | -0.453140 |
| 8             | 6             | 0           | -4.027732               | -2.403133 | -1.020252 |
| 9             | 6             | 0           | -4.154489               | -2.542692 | -2.397777 |

|    |    |   |           |           |           |
|----|----|---|-----------|-----------|-----------|
| 10 | 6  | 0 | -3.806094 | -1.488749 | -3.233746 |
| 11 | 6  | 0 | -3.330571 | -0.306401 | -2.681412 |
| 12 | 6  | 0 | -3.209362 | -0.150745 | -1.300879 |
| 13 | 8  | 0 | -0.306932 | -1.351885 | 1.012784  |
| 14 | 8  | 0 | -1.202863 | 0.824965  | -0.571379 |
| 15 | 15 | 0 | -0.054763 | 1.875348  | -0.131784 |
| 16 | 7  | 0 | -0.391595 | 3.265208  | -1.113414 |
| 17 | 7  | 0 | -0.674069 | 2.499651  | 1.361848  |
| 18 | 15 | 0 | 0.958267  | -1.366991 | -0.009970 |
| 19 | 7  | 0 | 1.816621  | -2.743798 | 0.646696  |
| 20 | 6  | 0 | 2.090024  | -2.830917 | 2.006482  |
| 21 | 6  | 0 | 3.068703  | -3.769158 | 2.195184  |
| 22 | 6  | 0 | 3.437793  | -4.263595 | 0.912741  |
| 23 | 6  | 0 | 2.672496  | -3.611059 | -0.015739 |
| 24 | 7  | 0 | 0.391937  | -2.125770 | -1.460506 |
| 25 | 6  | 0 | 0.195105  | -1.402996 | -2.631628 |
| 26 | 6  | 0 | -0.349385 | -2.231165 | -3.569917 |
| 27 | 6  | 0 | -0.505563 | -3.514462 | -2.969478 |
| 28 | 6  | 0 | -0.051563 | -3.429012 | -1.684092 |
| 29 | 6  | 0 | -0.227978 | 3.659787  | 1.986784  |
| 30 | 6  | 0 | -0.542146 | 3.580031  | 3.315429  |
| 31 | 6  | 0 | -1.169494 | 2.320134  | 3.534414  |
| 32 | 6  | 0 | -1.218479 | 1.668938  | 2.333703  |
| 33 | 6  | 0 | -1.425587 | 4.187540  | -0.966559 |
| 34 | 6  | 0 | -1.569252 | 4.865964  | -2.144314 |
| 35 | 6  | 0 | -0.619528 | 4.338858  | -3.065749 |
| 36 | 6  | 0 | 0.080131  | 3.360751  | -2.417846 |
| 37 | 1  | 0 | -3.544599 | -0.871301 | 4.920421  |
| 38 | 1  | 0 | -5.331744 | 0.228754  | 3.579775  |
| 39 | 1  | 0 | -5.301275 | 0.056438  | 1.106624  |
| 40 | 1  | 0 | -1.724857 | -2.103187 | 3.757915  |
| 41 | 1  | 0 | -4.306075 | -3.224337 | -0.358856 |
| 42 | 1  | 0 | -4.525844 | -3.477017 | -2.815459 |
| 43 | 1  | 0 | -3.894997 | -1.589801 | -4.314017 |
| 44 | 1  | 0 | -3.031774 | 0.519636  | -3.328445 |
| 45 | 1  | 0 | 1.545992  | -2.213228 | 2.713032  |
| 46 | 1  | 0 | 3.470478  | -4.081121 | 3.152288  |
| 47 | 1  | 0 | 4.176300  | -5.027496 | 0.698696  |
| 48 | 1  | 0 | 2.644011  | -3.693860 | -1.095513 |
| 49 | 1  | 0 | 0.465248  | -0.352411 | -2.666312 |
| 50 | 1  | 0 | -0.609237 | -1.953202 | -4.584947 |
| 51 | 1  | 0 | -0.899764 | -4.408501 | -3.439871 |
| 52 | 1  | 0 | 0.045488  | -4.180269 | -0.909495 |
| 53 | 1  | 0 | 0.261793  | 4.440197  | 1.415701  |
| 54 | 1  | 0 | -0.355693 | 4.350175  | 4.054902  |
| 55 | 1  | 0 | -1.553971 | 1.936800  | 4.472738  |
| 56 | 1  | 0 | -1.563894 | 0.676663  | 2.068219  |
| 57 | 1  | 0 | -1.948696 | 4.274126  | -0.022409 |
| 58 | 1  | 0 | -2.276122 | 5.667441  | -2.326645 |
| 59 | 1  | 0 | -0.456525 | 4.660623  | -4.087641 |
| 60 | 1  | 0 | 0.888153  | 2.724977  | -2.758954 |
| 61 | 45 | 0 | 2.065630  | 0.803621  | -0.051020 |
| 62 | 6  | 0 | 2.887456  | 1.681076  | -1.559858 |
| 63 | 8  | 0 | 3.448157  | 2.226488  | -2.412086 |
| 64 | 6  | 0 | -1.309156 | -2.373173 | 1.140808  |
| 65 | 1  | 0 | -1.558389 | -2.772126 | 0.150096  |
| 66 | 1  | 0 | -0.907425 | -3.189601 | 1.759712  |
| 67 | 6  | 0 | -2.598296 | 1.110144  | -0.772346 |
| 68 | 1  | 0 | -2.695555 | 1.930128  | -1.499351 |
| 69 | 1  | 0 | -3.036748 | 1.432439  | 0.182764  |
| 70 | 6  | 0 | 2.309573  | 1.133240  | 1.891857  |
| 71 | 8  | 0 | 2.525354  | 1.280950  | 3.011700  |
| 72 | 6  | 0 | 4.329356  | -0.938245 | -1.247986 |
| 73 | 6  | 0 | 3.982610  | -0.250384 | 0.059437  |
| 74 | 6  | 0 | 5.121430  | 0.640444  | 0.514478  |
| 75 | 1  | 0 | 5.144873  | -1.664000 | -1.084543 |

|    |   |   |          |           |           |
|----|---|---|----------|-----------|-----------|
| 76 | 1 | 0 | 4.678719 | -0.219951 | -2.003272 |
| 77 | 1 | 0 | 3.487081 | -1.488336 | -1.687247 |
| 78 | 1 | 0 | 5.296560 | 1.468113  | -0.187284 |
| 79 | 1 | 0 | 4.954710 | 1.077735  | 1.506315  |
| 80 | 1 | 0 | 6.056445 | 0.055329  | 0.564628  |
| 81 | 1 | 0 | 3.780445 | -1.009823 | 0.829565  |

Complex VI

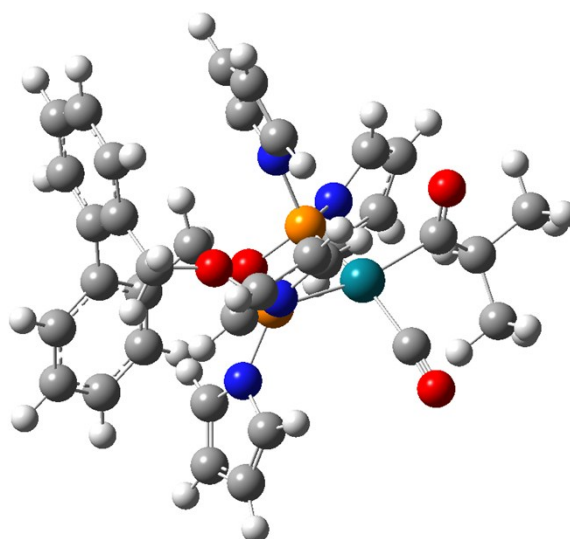

| Center Number | Atomic Number | Atomic Type | Coordinates (Angstroms) |           |           |
|---------------|---------------|-------------|-------------------------|-----------|-----------|
|               |               |             | X                       | Y         | Z         |
| 1             | 6             | 0           | -3.292836               | -0.851546 | 4.022290  |
| 2             | 6             | 0           | -4.423671               | -0.466534 | 3.307166  |
| 3             | 6             | 0           | -4.498221               | -0.719654 | 1.942902  |
| 4             | 6             | 0           | -3.448983               | -1.348488 | 1.264539  |
| 5             | 6             | 0           | -2.308023               | -1.732371 | 1.987350  |
| 6             | 6             | 0           | -2.246866               | -1.479752 | 3.359415  |
| 7             | 6             | 0           | -3.598567               | -1.627564 | -0.191488 |
| 8             | 6             | 0           | -3.991321               | -2.903720 | -0.599597 |
| 9             | 6             | 0           | -4.170091               | -3.203337 | -1.946035 |



|    |    |   |           |           |           |
|----|----|---|-----------|-----------|-----------|
| 10 | 6  | 0 | -3.952118 | -2.223466 | -2.907024 |
| 11 | 6  | 0 | -3.559082 | -0.951143 | -2.510779 |
| 12 | 6  | 0 | -3.383879 | -0.636930 | -1.164371 |
| 13 | 8  | 0 | -0.114546 | -1.296822 | 1.215265  |
| 14 | 8  | 0 | -1.492795 | 0.588537  | -0.486743 |
| 15 | 15 | 0 | -0.429054 | 1.782676  | -0.219533 |
| 16 | 7  | 0 | -0.693480 | 2.940096  | -1.475462 |
| 17 | 7  | 0 | -1.215117 | 2.642382  | 1.064930  |
| 18 | 15 | 0 | 1.047179  | -1.207893 | 0.093567  |
| 19 | 7  | 0 | 2.046712  | -2.541360 | 0.606605  |
| 20 | 6  | 0 | 2.359829  | -2.780098 | 1.937204  |
| 21 | 6  | 0 | 3.435242  | -3.626718 | 1.983074  |
| 22 | 6  | 0 | 3.823228  | -3.897684 | 0.640555  |
| 23 | 6  | 0 | 2.972655  | -3.208525 | -0.181854 |
| 24 | 7  | 0 | 0.450675  | -1.939926 | -1.348281 |
| 25 | 6  | 0 | 0.228685  | -1.213701 | -2.513824 |
| 26 | 6  | 0 | -0.314270 | -2.044289 | -3.449185 |
| 27 | 6  | 0 | -0.439963 | -3.334646 | -2.854835 |
| 28 | 6  | 0 | 0.038191  | -3.253000 | -1.579053 |
| 29 | 6  | 0 | -0.975264 | 3.965319  | 1.415836  |
| 30 | 6  | 0 | -1.378454 | 4.146369  | 2.710440  |
| 31 | 6  | 0 | -1.849641 | 2.892027  | 3.193657  |
| 32 | 6  | 0 | -1.717311 | 1.984013  | 2.180348  |
| 33 | 6  | 0 | -1.799172 | 3.745001  | -1.734989 |
| 34 | 6  | 0 | -1.606530 | 4.361965  | -2.939548 |
| 35 | 6  | 0 | -0.351081 | 3.926447  | -3.454809 |
| 36 | 6  | 0 | 0.186231  | 3.059672  | -2.546173 |
| 37 | 1  | 0 | -3.226152 | -0.660725 | 5.091805  |
| 38 | 1  | 0 | -5.251307 | 0.027366  | 3.813301  |
| 39 | 1  | 0 | -5.385899 | -0.431013 | 1.379192  |
| 40 | 1  | 0 | -1.348912 | -1.772211 | 3.905870  |
| 41 | 1  | 0 | -4.162051 | -3.667108 | 0.160220  |
| 42 | 1  | 0 | -4.478619 | -4.204681 | -2.241974 |
| 43 | 1  | 0 | -4.081798 | -2.449371 | -3.964064 |
| 44 | 1  | 0 | -3.367510 | -0.181922 | -3.259806 |
| 45 | 1  | 0 | 1.776279  | -2.319092 | 2.725868  |
| 46 | 1  | 0 | 3.888905  | -4.024110 | 2.883783  |
| 47 | 1  | 0 | 4.634622  | -4.538626 | 0.315462  |
| 48 | 1  | 0 | 2.931368  | -3.128496 | -1.262224 |
| 49 | 1  | 0 | 0.498277  | -0.164034 | -2.555108 |
| 50 | 1  | 0 | -0.586824 | -1.766092 | -4.460669 |
| 51 | 1  | 0 | -0.831706 | -4.230346 | -3.323983 |
| 52 | 1  | 0 | 0.170988  | -4.010993 | -0.816446 |
| 53 | 1  | 0 | -0.548870 | 4.654554  | 0.695849  |
| 54 | 1  | 0 | -1.352981 | 5.084156  | 3.253307  |
| 55 | 1  | 0 | -2.252989 | 2.683106  | 4.178233  |
| 56 | 1  | 0 | -1.917412 | 0.919160  | 2.140067  |
| 57 | 1  | 0 | -2.599387 | 3.826363  | -1.009037 |
| 58 | 1  | 0 | -2.288054 | 5.066921  | -3.402195 |
| 59 | 1  | 0 | 0.109510  | 4.232151  | -4.386789 |
| 60 | 1  | 0 | 1.124583  | 2.511743  | -2.536267 |
| 61 | 45 | 0 | 1.777430  | 0.990456  | -0.085777 |
| 62 | 6  | 0 | 3.639719  | 0.197958  | -0.489839 |
| 63 | 8  | 0 | 3.773864  | 0.033214  | -1.682103 |
| 64 | 6  | 0 | -1.110310 | -2.329570 | 1.313965  |
| 65 | 1  | 0 | -1.361677 | -2.701132 | 0.313507  |
| 66 | 1  | 0 | -0.687698 | -3.158864 | 1.902091  |
| 67 | 6  | 0 | -2.888915 | 0.726066  | -0.789479 |
| 68 | 1  | 0 | -3.010802 | 1.429226  | -1.626129 |
| 69 | 1  | 0 | -3.404668 | 1.135658  | 0.091510  |
| 70 | 6  | 0 | 2.515225  | 2.674871  | 0.488280  |
| 71 | 8  | 0 | 2.849904  | 3.700208  | 0.894341  |
| 72 | 6  | 0 | 5.961617  | -0.707770 | -0.160157 |
| 73 | 6  | 0 | 4.695269  | -0.219363 | 0.527185  |
| 74 | 6  | 0 | 4.983329  | 0.880059  | 1.540304  |
| 75 | 1  | 0 | 6.668331  | -1.106048 | 0.579324  |

|    |   |   |          |           |           |
|----|---|---|----------|-----------|-----------|
| 76 | 1 | 0 | 6.454312 | 0.116304  | -0.694204 |
| 77 | 1 | 0 | 5.743327 | -1.492575 | -0.893040 |
| 78 | 1 | 0 | 5.387093 | 1.777760  | 1.049419  |
| 79 | 1 | 0 | 4.083170 | 1.168443  | 2.096840  |
| 80 | 1 | 0 | 5.731714 | 0.532507  | 2.263979  |
| 81 | 1 | 0 | 4.225757 | -1.059041 | 1.072299  |

## II. L3 system

Complex I

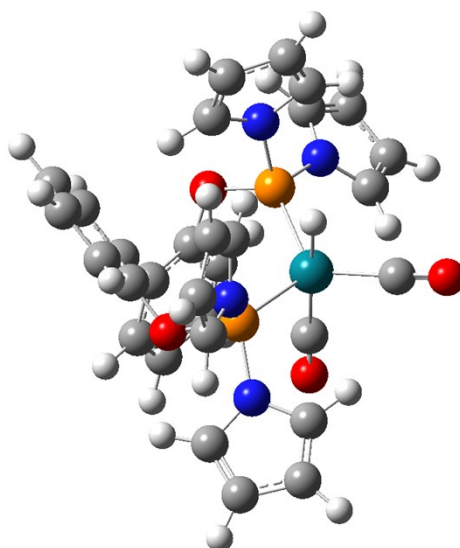

| Center Number | Atomic Number | Atomic Type | Coordinates (Angstroms) |           |          |
|---------------|---------------|-------------|-------------------------|-----------|----------|
|               |               |             | X                       | Y         | Z        |
| 1             | 6             | 0           | -1.924754               | -2.354603 | 3.299496 |
| 2             | 6             | 0           | -0.668352               | -2.190670 | 3.875925 |
| 3             | 6             | 0           | 0.073824                | -1.043221 | 3.617027 |
| 4             | 6             | 0           | -0.419794               | -0.040638 | 2.779616 |
| 5             | 6             | 0           | -1.671911               | -0.242280 | 2.191219 |
| 6             | 6             | 0           | -2.428339               | -1.381777 | 2.443280 |
| 7             | 6             | 0           | 0.313896                | 1.225429  | 2.547776 |
| 8             | 6             | 0           | -0.208532               | 2.429738  | 3.032359 |
| 9             | 6             | 0           | 0.450637                | 3.636086  | 2.833099 |

|    |    |   |           |           |           |
|----|----|---|-----------|-----------|-----------|
| 10 | 6  | 0 | 1.655039  | 3.660404  | 2.133947  |
| 11 | 6  | 0 | 2.196069  | 2.479419  | 1.642878  |
| 12 | 6  | 0 | 1.526771  | 1.276136  | 1.854361  |
| 13 | 8  | 0 | -2.153489 | 0.709410  | 1.309952  |
| 14 | 15 | 0 | 1.890317  | -0.312940 | -0.206187 |
| 15 | 7  | 0 | 2.813941  | 0.896092  | -1.026276 |
| 16 | 7  | 0 | 3.037856  | -1.593910 | -0.126664 |
| 17 | 15 | 0 | -2.018490 | 0.325544  | -0.297105 |
| 18 | 7  | 0 | -3.598876 | -0.273010 | -0.633406 |
| 19 | 6  | 0 | -3.868854 | -1.558777 | -1.089002 |
| 20 | 6  | 0 | -5.214358 | -1.772172 | -1.000910 |
| 21 | 6  | 0 | -5.802653 | -0.588456 | -0.461792 |
| 22 | 6  | 0 | -4.798345 | 0.309801  | -0.239151 |
| 23 | 7  | 0 | -2.226915 | 1.940300  | -0.864792 |
| 24 | 6  | 0 | -2.654304 | 2.209651  | -2.160405 |
| 25 | 6  | 0 | -2.123800 | 3.406548  | -2.550831 |
| 26 | 6  | 0 | -1.311871 | 3.885403  | -1.480302 |
| 27 | 6  | 0 | -1.370410 | 2.963735  | -0.472057 |
| 28 | 6  | 0 | 3.239678  | -2.479137 | -1.178597 |
| 29 | 6  | 0 | 4.362821  | -3.211283 | -0.918253 |
| 30 | 6  | 0 | 4.882628  | -2.767290 | 0.331815  |
| 31 | 6  | 0 | 4.066010  | -1.773903 | 0.793730  |
| 32 | 6  | 0 | 4.197857  | 1.042271  | -0.997441 |
| 33 | 6  | 0 | 4.511583  | 2.242814  | -1.570267 |
| 34 | 6  | 0 | 3.291051  | 2.873521  | -1.952679 |
| 35 | 6  | 0 | 2.268711  | 2.036525  | -1.606911 |
| 36 | 1  | 0 | -2.509860 | -3.248817 | 3.504932  |
| 37 | 1  | 0 | -0.266038 | -2.956577 | 4.535840  |
| 38 | 1  | 0 | 1.054151  | -0.906200 | 4.072267  |
| 39 | 1  | 0 | -3.402925 | -1.486468 | 1.964800  |
| 40 | 1  | 0 | -1.155116 | 2.403256  | 3.571177  |
| 41 | 1  | 0 | 0.023536  | 4.558259  | 3.222551  |
| 42 | 1  | 0 | 2.177190  | 4.600885  | 1.969083  |
| 43 | 1  | 0 | 3.135770  | 2.469240  | 1.090859  |
| 44 | 1  | 0 | -3.058937 | -2.187134 | -1.441878 |
| 45 | 1  | 0 | -5.733008 | -2.675681 | -1.299443 |
| 46 | 1  | 0 | -6.856024 | -0.418654 | -0.269287 |
| 47 | 1  | 0 | -4.804881 | 1.315351  | 0.163539  |
| 48 | 1  | 0 | -3.314263 | 1.518713  | -2.671962 |
| 49 | 1  | 0 | -2.315916 | 3.906002  | -3.493344 |
| 50 | 1  | 0 | -0.768906 | 4.823189  | -1.447336 |
| 51 | 1  | 0 | -0.909095 | 2.944379  | 0.509986  |
| 52 | 1  | 0 | 2.552070  | -2.494395 | -2.016690 |
| 53 | 1  | 0 | 4.766069  | -3.994462 | -1.549231 |
| 54 | 1  | 0 | 5.756642  | -3.152389 | 0.844715  |
| 55 | 1  | 0 | 4.099824  | -1.179615 | 1.696133  |
| 56 | 1  | 0 | 4.825136  | 0.247416  | -0.609357 |
| 57 | 1  | 0 | 5.514824  | 2.622994  | -1.726988 |
| 58 | 1  | 0 | 3.180416  | 3.836192  | -2.438117 |
| 59 | 1  | 0 | 1.193112  | 2.151398  | -1.691303 |
| 60 | 45 | 0 | -0.182846 | -0.909258 | -1.117093 |
| 61 | 6  | 0 | -0.285533 | -2.546800 | 0.008189  |
| 62 | 8  | 0 | -0.271563 | -3.515088 | 0.620986  |
| 63 | 6  | 0 | -0.286300 | -1.748613 | -2.879752 |
| 64 | 8  | 0 | -0.318387 | -2.178861 | -3.945682 |
| 65 | 8  | 0 | 2.095886  | 0.106527  | 1.386275  |
| 66 | 1  | 0 | -0.025501 | 0.401288  | -2.044842 |

**Complex II**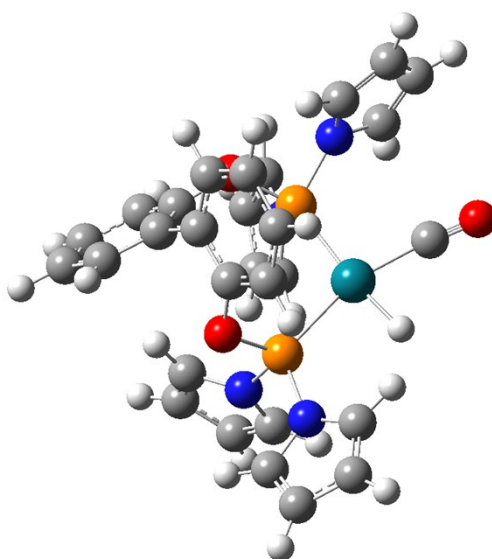

| Center Number | Atomic Number | Atomic Type | Coordinates (Angstroms) |           |          |
|---------------|---------------|-------------|-------------------------|-----------|----------|
|               |               |             | X                       | Y         | Z        |
| 1             | 6             | 0           | -1.238305               | -2.904806 | 2.990659 |
| 2             | 6             | 0           | -0.125800               | -2.458736 | 3.699202 |
| 3             | 6             | 0           | 0.279481                | -1.132584 | 3.595025 |
| 4             | 6             | 0           | -0.408850               | -0.234367 | 2.777349 |
| 5             | 6             | 0           | -1.506083               | -0.712080 | 2.058400 |
| 6             | 6             | 0           | -1.935871               | -2.029626 | 2.166298 |
| 7             | 6             | 0           | 0.002002                | 1.180323  | 2.631575 |
| 8             | 6             | 0           | -0.757491               | 2.210195  | 3.192963 |

|    |    |   |           |           |           |
|----|----|---|-----------|-----------|-----------|
| 9  | 6  | 0 | -0.409784 | 3.542648  | 3.004395  |
| 10 | 6  | 0 | 0.699577  | 3.864728  | 2.226076  |
| 11 | 6  | 0 | 1.470083  | 2.857384  | 1.658673  |
| 12 | 6  | 0 | 1.126567  | 1.525797  | 1.877980  |
| 13 | 8  | 0 | -2.158735 | 0.154788  | 1.190180  |
| 14 | 15 | 0 | 1.770431  | -0.067695 | -0.142823 |
| 15 | 7  | 0 | 2.336515  | 1.237565  | -1.103449 |
| 16 | 7  | 0 | 3.221438  | -1.003470 | -0.058301 |
| 17 | 15 | 0 | -1.907188 | -0.131504 | -0.414350 |
| 18 | 7  | 0 | -3.451998 | -0.692564 | -0.917564 |
| 19 | 6  | 0 | -3.782238 | -2.018951 | -1.187986 |
| 20 | 6  | 0 | -5.142113 | -2.126732 | -1.212719 |
| 21 | 6  | 0 | -5.683894 | -0.836867 | -0.931925 |
| 22 | 6  | 0 | -4.638047 | 0.017901  | -0.742573 |
| 23 | 7  | 0 | -2.061200 | 1.493454  | -0.970750 |
| 24 | 6  | 0 | -2.180825 | 1.802991  | -2.321690 |
| 25 | 6  | 0 | -1.909317 | 3.134958  | -2.479774 |
| 26 | 6  | 0 | -1.589014 | 3.662375  | -1.196199 |
| 27 | 6  | 0 | -1.672413 | 2.639220  | -0.292843 |
| 28 | 6  | 0 | 4.067730  | -1.278112 | -1.124750 |
| 29 | 6  | 0 | 4.787607  | -2.401447 | -0.821262 |
| 30 | 6  | 0 | 4.349547  | -2.863872 | 0.452031  |
| 31 | 6  | 0 | 3.379513  | -2.004267 | 0.889867  |
| 32 | 6  | 0 | 3.529952  | 1.940379  | -0.954410 |
| 33 | 6  | 0 | 3.445688  | 3.081644  | -1.700868 |
| 34 | 6  | 0 | 2.157770  | 3.106225  | -2.316174 |
| 35 | 6  | 0 | 1.496535  | 1.976174  | -1.932761 |
| 36 | 1  | 0 | -1.563475 | -3.939831 | 3.074213  |
| 37 | 1  | 0 | 0.424488  | -3.144449 | 4.340505  |
| 38 | 1  | 0 | 1.148145  | -0.774504 | 4.147482  |
| 39 | 1  | 0 | -2.805785 | -2.354079 | 1.594771  |
| 40 | 1  | 0 | -1.639682 | 1.945845  | 3.775559  |
| 41 | 1  | 0 | -1.011026 | 4.329552  | 3.455716  |
| 42 | 1  | 0 | 0.969694  | 4.905800  | 2.059177  |
| 43 | 1  | 0 | 2.341823  | 3.085186  | 1.045873  |
| 44 | 1  | 0 | -2.998851 | -2.749227 | -1.351860 |
| 45 | 1  | 0 | -5.698229 | -3.031501 | -1.429078 |
| 46 | 1  | 0 | -6.733458 | -0.569121 | -0.889926 |
| 47 | 1  | 0 | -4.609965 | 1.074155  | -0.504797 |
| 48 | 1  | 0 | -2.474997 | 1.040223  | -3.034152 |
| 49 | 1  | 0 | -1.952543 | 3.680408  | -3.415512 |
| 50 | 1  | 0 | -1.332595 | 4.688259  | -0.957452 |
| 51 | 1  | 0 | -1.513525 | 2.615003  | 0.778015  |
| 52 | 1  | 0 | 4.084462  | -0.631853 | -1.994539 |
| 53 | 1  | 0 | 5.560209  | -2.841048 | -1.441103 |
| 54 | 1  | 0 | 4.723369  | -3.725141 | 0.993312  |
| 55 | 1  | 0 | 2.784097  | -1.991470 | 1.795835  |
| 56 | 1  | 0 | 4.320137  | 1.543278  | -0.328406 |
| 57 | 1  | 0 | 4.228891  | 3.823787  | -1.808824 |
| 58 | 1  | 0 | 1.763123  | 3.871803  | -2.974187 |
| 59 | 1  | 0 | 0.498112  | 1.616958  | -2.167574 |
| 60 | 45 | 0 | -0.023549 | -1.296084 | -1.046258 |
| 61 | 6  | 0 | 1.107806  | -2.590018 | -1.895879 |
| 62 | 8  | 0 | 1.689497  | -3.421010 | -2.432866 |
| 63 | 8  | 0 | 1.953094  | 0.531015  | 1.392091  |
| 64 | 1  | 0 | -1.104386 | -2.222343 | -1.820738 |

**Complex III**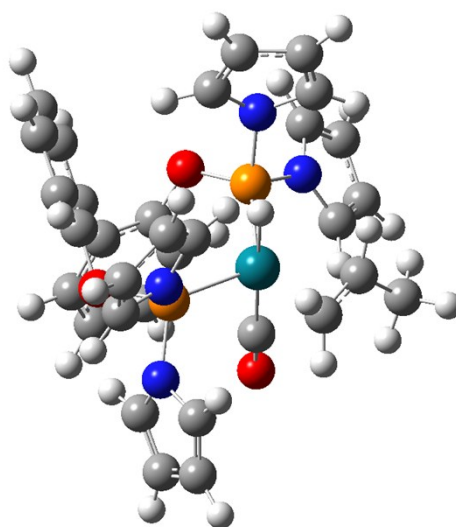

| Center Number | Atomic Number | Atomic Type | Coordinates (Angstroms) |           |          |
|---------------|---------------|-------------|-------------------------|-----------|----------|
|               |               |             | X                       | Y         | Z        |
| 1             | 6             | 0           | -1.612788               | -1.874436 | 3.590340 |
| 2             | 6             | 0           | -0.345197               | -1.624204 | 4.109250 |
| 3             | 6             | 0           | 0.347498                | -0.479660 | 3.729422 |
| 4             | 6             | 0           | -0.203564               | 0.427128  | 2.820972 |
| 5             | 6             | 0           | -1.467434               | 0.142351  | 2.296420 |
| 6             | 6             | 0           | -2.178838               | -0.990407 | 2.679013 |
| 7             | 6             | 0           | 0.506933                | 1.660747  | 2.416397 |
| 8             | 6             | 0           | -0.016824               | 2.920897  | 2.721470 |
| 9             | 6             | 0           | 0.633748                | 4.084617  | 2.329525 |
| 10            | 6             | 0           | 1.822270                | 4.005926  | 1.607591 |

|    |    |   |           |           |           |
|----|----|---|-----------|-----------|-----------|
| 11 | 6  | 0 | 2.361390  | 2.765528  | 1.289038  |
| 12 | 6  | 0 | 1.707491  | 1.608174  | 1.703524  |
| 13 | 8  | 0 | -2.000585 | 0.998541  | 1.351625  |
| 14 | 15 | 0 | 1.972764  | -0.276314 | -0.079439 |
| 15 | 7  | 0 | 3.117920  | 0.587874  | -1.045477 |
| 16 | 7  | 0 | 2.928999  | -1.690730 | 0.227504  |
| 17 | 15 | 0 | -1.959677 | 0.450952  | -0.217819 |
| 18 | 7  | 0 | -3.559360 | -0.199069 | -0.354176 |
| 19 | 6  | 0 | -3.841074 | -1.552069 | -0.502446 |
| 20 | 6  | 0 | -5.171196 | -1.747534 | -0.258923 |
| 21 | 6  | 0 | -5.736217 | -0.479334 | 0.068423  |
| 22 | 6  | 0 | -4.733103 | 0.446677  | 0.015302  |
| 23 | 7  | 0 | -2.264419 | 1.990234  | -0.936687 |
| 24 | 6  | 0 | -2.751396 | 2.084603  | -2.237514 |
| 25 | 6  | 0 | -2.258592 | 3.226314  | -2.803256 |
| 26 | 6  | 0 | -1.406077 | 3.846857  | -1.842118 |
| 27 | 6  | 0 | -1.407247 | 3.063326  | -0.722526 |
| 28 | 6  | 0 | 3.498708  | -2.455673 | -0.781850 |
| 29 | 6  | 0 | 3.677179  | -3.728139 | -0.312926 |
| 30 | 6  | 0 | 3.171933  | -3.768297 | 1.018402  |
| 31 | 6  | 0 | 2.704845  | -2.518587 | 1.319907  |
| 32 | 6  | 0 | 4.473553  | 0.727763  | -0.762040 |
| 33 | 6  | 0 | 4.988025  | 1.687967  | -1.586826 |
| 34 | 6  | 0 | 3.921414  | 2.177989  | -2.397630 |
| 35 | 6  | 0 | 2.790137  | 1.500552  | -2.043032 |
| 36 | 1  | 0 | -2.162693 | -2.764814 | 3.888989  |
| 37 | 1  | 0 | 0.100859  | -2.317637 | 4.819757  |
| 38 | 1  | 0 | 1.336985  | -0.272704 | 4.137155  |
| 39 | 1  | 0 | -3.168657 | -1.164842 | 2.256018  |
| 40 | 1  | 0 | -0.957657 | 2.972792  | 3.268652  |
| 41 | 1  | 0 | 0.209192  | 5.054090  | 2.583454  |
| 42 | 1  | 0 | 2.334867  | 4.912471  | 1.291634  |
| 43 | 1  | 0 | 3.292966  | 2.674244  | 0.730561  |
| 44 | 1  | 0 | -3.051397 | -2.247117 | -0.760442 |
| 45 | 1  | 0 | -5.692316 | -2.696130 | -0.315997 |
| 46 | 1  | 0 | -6.773744 | -0.274048 | 0.306852  |
| 47 | 1  | 0 | -4.727969 | 1.513344  | 0.202981  |
| 48 | 1  | 0 | -3.427442 | 1.328919  | -2.622039 |
| 49 | 1  | 0 | -2.505550 | 3.601939  | -3.789675 |
| 50 | 1  | 0 | -0.877546 | 4.786476  | -1.955452 |
| 51 | 1  | 0 | -0.891967 | 3.172583  | 0.225691  |
| 52 | 1  | 0 | 3.753036  | -2.002288 | -1.733087 |
| 53 | 1  | 0 | 4.149882  | -4.540684 | -0.852572 |
| 54 | 1  | 0 | 3.174920  | -4.620994 | 1.687374  |
| 55 | 1  | 0 | 2.230528  | -2.128467 | 2.213497  |
| 56 | 1  | 0 | 4.933619  | 0.115333  | 0.003816  |
| 57 | 1  | 0 | 6.024936  | 2.003250  | -1.617657 |
| 58 | 1  | 0 | 3.985998  | 2.943995  | -3.161513 |
| 59 | 1  | 0 | 1.764647  | 1.583554  | -2.385211 |
| 60 | 45 | 0 | -0.133030 | -0.729576 | -0.996464 |
| 61 | 8  | 0 | 2.273951  | 0.380387  | 1.416995  |
| 62 | 6  | 0 | -0.676348 | -1.472329 | -3.113400 |
| 63 | 6  | 0 | -1.679535 | -2.583214 | -3.185480 |
| 64 | 6  | 0 | 0.676607  | -1.688785 | -2.870680 |
| 65 | 1  | 0 | -0.955285 | -0.555157 | -3.637402 |
| 66 | 1  | 0 | -2.686314 | -2.251696 | -2.902746 |
| 67 | 1  | 0 | -1.397757 | -3.429850 | -2.543215 |
| 68 | 1  | 0 | -1.747003 | -2.962509 | -4.217157 |
| 69 | 1  | 0 | 1.428034  | -0.996822 | -3.249930 |
| 70 | 1  | 0 | 1.034481  | -2.691636 | -2.629243 |
| 71 | 6  | 0 | -0.415095 | -2.415074 | 0.000292  |
| 72 | 8  | 0 | -0.628108 | -3.378119 | 0.590810  |
| 73 | 1  | 0 | 0.047111  | 0.643063  | -1.824788 |

**Complex IV**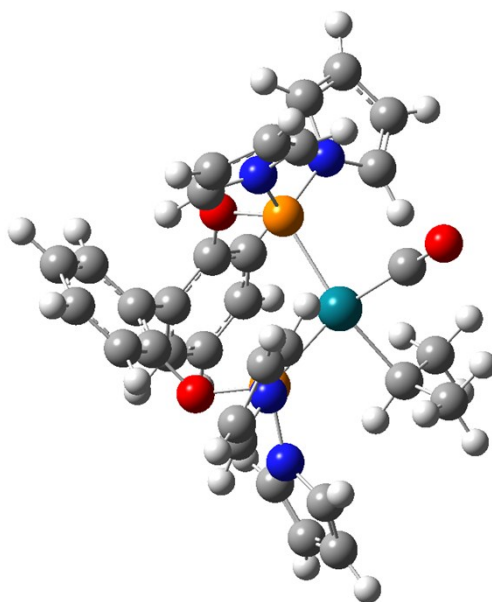

| Center Number | Atomic Number | Atomic Type | Coordinates (Angstroms) |           |          |
|---------------|---------------|-------------|-------------------------|-----------|----------|
|               |               |             | X                       | Y         | Z-       |
| 1             | 6             | 0           | -1.055628               | -1.518160 | 3.897220 |
| 2             | 6             | 0           | 0.092593                | -0.872091 | 4.349181 |
| 3             | 6             | 0           | 0.460855                | 0.355990  | 3.809367 |
| 4             | 6             | 0           | -0.303747               | 0.953512  | 2.805954 |
| 5             | 6             | 0           | -1.440800               | 0.279109  | 2.358404 |
| 6             | 6             | 0           | -1.831593               | -0.943034 | 2.896342 |
| 7             | 6             | 0           | 0.071781                | 2.234505  | 2.167796 |
| 8             | 6             | 0           | -0.689613               | 3.391263  | 2.350964 |



|    |    |   |           |           |           |
|----|----|---|-----------|-----------|-----------|
| 9  | 6  | 0 | -0.367563 | 4.571386  | 1.691087  |
| 10 | 6  | 0 | 0.713652  | 4.601708  | 0.813013  |
| 11 | 6  | 0 | 1.483362  | 3.462260  | 0.612902  |
| 12 | 6  | 0 | 1.167031  | 2.293841  | 1.302174  |
| 13 | 8  | 0 | -2.159112 | 0.835195  | 1.312601  |
| 14 | 15 | 0 | 1.808119  | 0.046304  | -0.002135 |
| 15 | 7  | 0 | 2.388299  | 0.910812  | -1.375799 |
| 16 | 7  | 0 | 3.278670  | -0.751231 | 0.460726  |
| 17 | 15 | 0 | -1.951847 | 0.067706  | -0.140013 |
| 18 | 7  | 0 | -3.401620 | -0.867313 | -0.223713 |
| 19 | 6  | 0 | -3.440390 | -2.255549 | -0.116749 |
| 20 | 6  | 0 | -4.723043 | -2.631829 | 0.160812  |
| 21 | 6  | 0 | -5.509146 | -1.444046 | 0.249389  |
| 22 | 6  | 0 | -4.681443 | -0.382237 | 0.024217  |
| 23 | 7  | 0 | -2.455330 | 1.378361  | -1.142300 |
| 24 | 6  | 0 | -2.893877 | 1.178996  | -2.449161 |
| 25 | 6  | 0 | -2.646319 | 2.318151  | -3.163198 |
| 26 | 6  | 0 | -2.004176 | 3.242980  | -2.289132 |
| 27 | 6  | 0 | -1.876753 | 2.639869  | -1.069158 |
| 28 | 6  | 0 | 4.220222  | -1.325613 | -0.379820 |
| 29 | 6  | 0 | 4.991151  | -2.183265 | 0.357682  |
| 30 | 6  | 0 | 4.494823  | -2.167779 | 1.691129  |
| 31 | 6  | 0 | 3.438457  | -1.297905 | 1.726679  |
| 32 | 6  | 0 | 3.570650  | 1.642680  | -1.454241 |
| 33 | 6  | 0 | 3.528739  | 2.400832  | -2.590189 |
| 34 | 6  | 0 | 2.276601  | 2.156448  | -3.229595 |
| 35 | 6  | 0 | 1.595331  | 1.251637  | -2.467869 |
| 36 | 1  | 0 | -1.350543 | -2.474833 | 4.324134  |
| 37 | 1  | 0 | 0.699763  | -1.323835 | 5.131448  |
| 38 | 1  | 0 | 1.359602  | 0.866387  | 4.155682  |
| 39 | 1  | 0 | -2.736394 | -1.425587 | 2.523899  |
| 40 | 1  | 0 | -1.551951 | 3.348309  | 3.015599  |
| 41 | 1  | 0 | -0.968296 | 5.464298  | 1.852594  |
| 42 | 1  | 0 | 0.962608  | 5.517776  | 0.280533  |
| 43 | 1  | 0 | 2.334709  | 3.461033  | -0.067221 |
| 44 | 1  | 0 | -2.534397 | -2.835830 | -0.249962 |
| 45 | 1  | 0 | -5.072913 | -3.651317 | 0.274220  |
| 46 | 1  | 0 | -6.574146 | -1.385350 | 0.442972  |
| 47 | 1  | 0 | -4.868151 | 0.684590  | 0.011613  |
| 48 | 1  | 0 | -3.361820 | 0.242787  | -2.732441 |
| 49 | 1  | 0 | -2.918468 | 2.485186  | -4.198988 |
| 50 | 1  | 0 | -1.691344 | 4.252889  | -2.528280 |
| 51 | 1  | 0 | -1.460300 | 2.996146  | -0.134002 |
| 52 | 1  | 0 | 4.261394  | -1.052481 | -1.427119 |
| 53 | 1  | 0 | 5.834806  | -2.752186 | -0.015273 |
| 54 | 1  | 0 | 4.885604  | -2.722388 | 2.536420  |
| 55 | 1  | 0 | 2.787201  | -0.993401 | 2.539337  |
| 56 | 1  | 0 | 4.326602  | 1.539467  | -0.685061 |
| 57 | 1  | 0 | 4.317347  | 3.058360  | -2.938896 |
| 58 | 1  | 0 | 1.921141  | 2.595881  | -4.153986 |
| 59 | 1  | 0 | 0.611310  | 0.807015  | -2.582714 |
| 60 | 45 | 0 | -0.044254 | -1.235611 | -0.605298 |
| 61 | 6  | 0 | -0.818308 | -1.888040 | -2.225218 |
| 62 | 8  | 0 | -1.199630 | -2.135861 | -3.286431 |
| 63 | 8  | 0 | 1.992086  | 1.197239  | 1.185775  |
| 64 | 6  | 0 | 1.274047  | -2.915581 | -0.721639 |
| 65 | 6  | 0 | 1.894952  | -3.278977 | -2.052351 |
| 66 | 6  | 0 | 0.404291  | -4.016882 | -0.148048 |
| 67 | 1  | 0 | 2.069960  | -2.694768 | 0.000211  |
| 68 | 1  | 0 | 2.409843  | -2.426221 | -2.516157 |
| 69 | 1  | 0 | 1.143347  | -3.637863 | -2.770321 |
| 70 | 1  | 0 | 2.639677  | -4.083772 | -1.925766 |
| 71 | 1  | 0 | -0.121646 | -3.700497 | 0.768406  |
| 72 | 1  | 0 | 1.025375  | -4.886045 | 0.133463  |
| 73 | 1  | 0 | -0.346292 | -4.373468 | -0.869332 |

Complex V

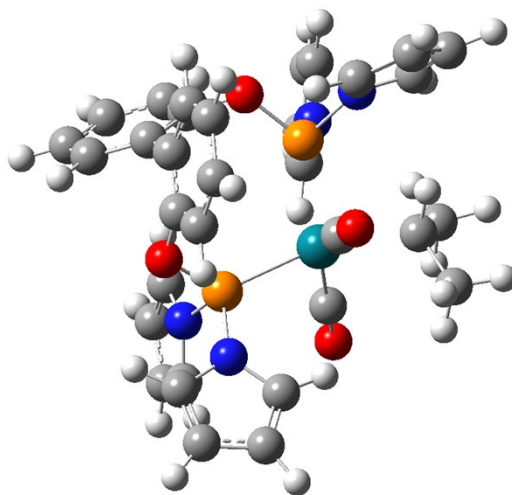

| Center Number | Atomic Number | Atomic Type | Coordinates (Angstroms) |           |          |
|---------------|---------------|-------------|-------------------------|-----------|----------|
|               |               |             | X                       | Y         | Z        |
| 1             | 6             | 0           | -1.212574               | -1.333867 | 4.163431 |
| 2             | 6             | 0           | -0.010539               | -0.744101 | 4.545747 |
| 3             | 6             | 0           | 0.433588                | 0.410966  | 3.910693 |
| 4             | 6             | 0           | -0.306208               | 0.993659  | 2.878793 |
| 5             | 6             | 0           | -1.499634               | 0.372732  | 2.504784 |
| 6             | 6             | 0           | -1.964535               | -0.773676 | 3.137120 |
| 7             | 6             | 0           | 0.144748                | 2.216593  | 2.177833 |
| 8             | 6             | 0           | -0.594814               | 3.401401  | 2.237949 |
| 9             | 6             | 0           | -0.174605               | 4.544440  | 1.570073 |
| 10            | 6             | 0           | 0.996392                | 4.517081  | 0.816234 |
| 11            | 6             | 0           | 1.742550                | 3.347709  | 0.729686 |

|    |    |   |           |           |           |
|----|----|---|-----------|-----------|-----------|
| 12 | 6  | 0 | 1.313799  | 2.210721  | 1.411611  |
| 13 | 8  | 0 | -2.214124 | 0.908677  | 1.445094  |
| 14 | 15 | 0 | 1.920561  | 0.065128  | 0.027034  |
| 15 | 7  | 0 | 2.904822  | 0.909808  | -1.117462 |
| 16 | 7  | 0 | 3.098766  | -1.063216 | 0.617150  |
| 17 | 15 | 0 | -2.001208 | 0.179239  | -0.022269 |
| 18 | 7  | 0 | -3.452621 | -0.747167 | -0.070072 |
| 19 | 6  | 0 | -3.655809 | -1.892965 | -0.832231 |
| 20 | 6  | 0 | -4.982878 | -2.212268 | -0.778800 |
| 21 | 6  | 0 | -5.630400 | -1.234966 | 0.033503  |
| 22 | 6  | 0 | -4.680200 | -0.346271 | 0.449630  |
| 23 | 7  | 0 | -2.469361 | 1.499653  | -1.024129 |
| 24 | 6  | 0 | -3.445564 | 1.475030  | -2.016853 |
| 25 | 6  | 0 | -3.224560 | 2.528745  | -2.856839 |
| 26 | 6  | 0 | -2.065277 | 3.217745  | -2.394384 |
| 27 | 6  | 0 | -1.612175 | 2.562970  | -1.284247 |
| 28 | 6  | 0 | 4.103707  | -1.708091 | -0.092499 |
| 29 | 6  | 0 | 4.534059  | -2.776663 | 0.645913  |
| 30 | 6  | 0 | 3.756766  | -2.817780 | 1.837987  |
| 31 | 6  | 0 | 2.879583  | -1.769479 | 1.792279  |
| 32 | 6  | 0 | 4.176866  | 1.434281  | -0.910429 |
| 33 | 6  | 0 | 4.465572  | 2.277759  | -1.946425 |
| 34 | 6  | 0 | 3.335318  | 2.298430  | -2.817505 |
| 35 | 6  | 0 | 2.392142  | 1.467568  | -2.285012 |
| 36 | 1  | 0 | -1.561775 | -2.239331 | 4.655410  |
| 37 | 1  | 0 | 0.582203  | -1.182826 | 5.346180  |
| 38 | 1  | 0 | 1.375080  | 0.874340  | 4.204037  |
| 39 | 1  | 0 | -2.901313 | -1.219565 | 2.804767  |
| 40 | 1  | 0 | -1.517774 | 3.408559  | 2.816557  |
| 41 | 1  | 0 | -0.765271 | 5.456143  | 1.632035  |
| 42 | 1  | 0 | 1.330342  | 5.408103  | 0.287944  |
| 43 | 1  | 0 | 2.664003  | 3.302496  | 0.149359  |
| 44 | 1  | 0 | -2.817814 | -2.371342 | -1.327919 |
| 45 | 1  | 0 | -5.446080 | -3.065947 | -1.259584 |
| 46 | 1  | 0 | -6.682704 | -1.200861 | 0.291658  |
| 47 | 1  | 0 | -4.742652 | 0.542770  | 1.064891  |
| 48 | 1  | 0 | -4.209731 | 0.706516  | -2.018776 |
| 49 | 1  | 0 | -3.834567 | 2.788751  | -3.713989 |
| 50 | 1  | 0 | -1.625386 | 4.109964  | -2.824818 |
| 51 | 1  | 0 | -0.766147 | 2.758095  | -0.633147 |
| 52 | 1  | 0 | 4.429713  | -1.329596 | -1.053714 |
| 53 | 1  | 0 | 5.334682  | -3.452216 | 0.367962  |
| 54 | 1  | 0 | 3.848093  | -3.531588 | 2.648305  |
| 55 | 1  | 0 | 2.120114  | -1.439866 | 2.494665  |
| 56 | 1  | 0 | 4.745064  | 1.150372  | -0.032589 |
| 57 | 1  | 0 | 5.395146  | 2.820305  | -2.077663 |
| 58 | 1  | 0 | 3.235017  | 2.861225  | -3.737979 |
| 59 | 1  | 0 | 1.392990  | 1.207632  | -2.618638 |
| 60 | 45 | 0 | -0.123074 | -1.075824 | -0.731041 |
| 61 | 6  | 0 | -0.653984 | -0.680185 | -2.556062 |
| 62 | 8  | 0 | -0.981058 | -0.453607 | -3.638026 |
| 63 | 8  | 0 | 2.073406  | 1.059882  | 1.357399  |
| 64 | 6  | 0 | -0.334676 | -2.452680 | 0.654852  |
| 65 | 8  | 0 | -0.415539 | -3.307305 | 1.420964  |
| 66 | 6  | 0 | 1.148435  | -2.624011 | -1.665885 |
| 67 | 6  | 0 | 2.002375  | -2.126322 | -2.816695 |
| 68 | 6  | 0 | 0.305707  | -3.805087 | -2.110675 |
| 69 | 1  | 0 | 1.807800  | -2.930014 | -0.839990 |
| 70 | 1  | 0 | 2.603092  | -1.241239 | -2.574360 |
| 71 | 1  | 0 | 1.398024  | -1.880529 | -3.701761 |
| 72 | 1  | 0 | 2.705406  | -2.921685 | -3.120093 |
| 73 | 1  | 0 | -0.267641 | -4.260030 | -1.293644 |
| 74 | 1  | 0 | 0.955988  | -4.590997 | -2.533894 |
| 75 | 1  | 0 | -0.407660 | -3.522284 | -2.89916  |

**Complex VI**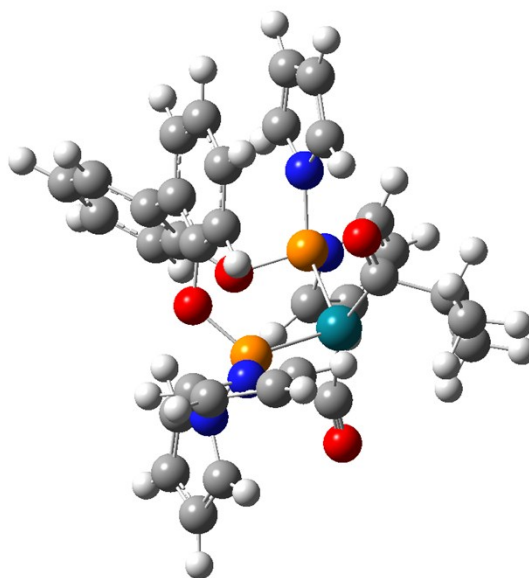

| Center Number | Atomic Number | Atomic Type | Coordinates (Angstroms) |          |          |
|---------------|---------------|-------------|-------------------------|----------|----------|
|               |               |             | X                       | Y        | Z        |
| 1             | 6             | 0           | -4.001384               | 1.571652 | 2.997958 |
| 2             | 6             | 0           | -3.742369               | 2.911196 | 2.729403 |
| 3             | 6             | 0           | -2.738057               | 3.254846 | 1.833445 |
| 4             | 6             | 0           | -1.955765               | 2.289080 | 1.188017 |
| 5             | 6             | 0           | -2.233713               | 0.949357 | 1.489043 |
| 6             | 6             | 0           | -3.241857               | 0.588120 | 2.376169 |

|    |    |   |           |           |           |
|----|----|---|-----------|-----------|-----------|
| 7  | 6  | 0 | -0.991268 | 2.725814  | 0.149722  |
| 8  | 6  | 0 | -1.470887 | 3.612676  | -0.823837 |
| 9  | 6  | 0 | -0.660426 | 4.111335  | -1.832869 |
| 10 | 6  | 0 | 0.674111  | 3.732253  | -1.886758 |
| 11 | 6  | 0 | 1.186945  | 2.868420  | -0.929313 |
| 12 | 6  | 0 | 0.364259  | 2.363105  | 0.074697  |
| 13 | 8  | 0 | -1.433985 | -0.044711 | 0.971269  |
| 14 | 8  | 0 | 0.909166  | 1.576099  | 1.074134  |
| 15 | 15 | 0 | 1.834912  | 0.244321  | 0.756585  |
| 16 | 7  | 0 | 3.402145  | 0.923813  | 0.520969  |
| 17 | 7  | 0 | 1.996703  | -0.174242 | 2.427466  |
| 18 | 15 | 0 | -1.476168 | -0.813771 | -0.481700 |
| 19 | 7  | 0 | -2.715868 | -1.986125 | -0.104902 |
| 20 | 6  | 0 | -2.689702 | -2.754799 | 1.050502  |
| 21 | 6  | 0 | -3.430975 | -3.885836 | 0.837646  |
| 22 | 6  | 0 | -3.906526 | -3.838775 | -0.503283 |
| 23 | 6  | 0 | -3.438288 | -2.681487 | -1.064229 |
| 24 | 7  | 0 | -2.424378 | 0.191196  | -1.500877 |
| 25 | 6  | 0 | -1.911405 | 0.841734  | -2.622404 |
| 26 | 6  | 0 | -2.917655 | 1.562073  | -3.194632 |
| 27 | 6  | 0 | -4.092085 | 1.370195  | -2.406486 |
| 28 | 6  | 0 | -3.771026 | 0.536684  | -1.374810 |
| 29 | 6  | 0 | 3.065370  | -0.915130 | 2.916291  |
| 30 | 6  | 0 | 2.685901  | -1.489385 | 4.097978  |
| 31 | 6  | 0 | 1.330504  | -1.122007 | 4.337783  |
| 32 | 6  | 0 | 0.924043  | -0.336244 | 3.294427  |
| 33 | 6  | 0 | 3.995573  | 1.941066  | 1.260025  |
| 34 | 6  | 0 | 5.134229  | 2.328010  | 0.612970  |
| 35 | 6  | 0 | 5.252999  | 1.536498  | -0.569221 |
| 36 | 6  | 0 | 4.181285  | 0.691908  | -0.605792 |
| 37 | 1  | 0 | -4.789455 | 1.288114  | 3.692895  |
| 38 | 1  | 0 | -4.320662 | 3.692476  | 3.218792  |
| 39 | 1  | 0 | -2.532559 | 4.304227  | 1.624724  |
| 40 | 1  | 0 | -3.420929 | -0.469724 | 2.562067  |
| 41 | 1  | 0 | -2.525039 | 3.885207  | -0.792363 |
| 42 | 1  | 0 | -1.076813 | 4.784500  | -2.580029 |
| 43 | 1  | 0 | 1.328063  | 4.106608  | -2.671661 |
| 44 | 1  | 0 | 2.238385  | 2.589857  | -0.957895 |
| 45 | 1  | 0 | -2.132710 | -2.420721 | 1.919249  |
| 46 | 1  | 0 | -3.627436 | -4.659690 | 1.570671  |
| 47 | 1  | 0 | -4.543254 | -4.566600 | -0.992762 |
| 48 | 1  | 0 | -3.576154 | -2.262771 | -2.054427 |
| 49 | 1  | 0 | -0.856699 | 0.770062  | -2.863861 |
| 50 | 1  | 0 | -2.823658 | 2.179608  | -4.080456 |
| 51 | 1  | 0 | -5.071909 | 1.798563  | -2.585448 |
| 52 | 1  | 0 | -4.367737 | 0.134417  | -0.565449 |
| 53 | 1  | 0 | 4.008873  | -0.932666 | 2.382998  |
| 54 | 1  | 0 | 3.318814  | -2.091080 | 4.739896  |
| 55 | 1  | 0 | 0.729568  | -1.388172 | 5.199789  |
| 56 | 1  | 0 | -0.021720 | 0.147655  | 3.085108  |
| 57 | 1  | 0 | 3.536813  | 2.283097  | 2.179856  |
| 58 | 1  | 0 | 5.822456  | 3.094677  | 0.950637  |
| 59 | 1  | 0 | 6.045971  | 1.586539  | -1.306103 |
| 60 | 1  | 0 | 3.873552  | -0.052911 | -1.330822 |
| 61 | 45 | 0 | 0.804986  | -1.328690 | -0.537450 |
| 62 | 6  | 0 | 0.721033  | -2.736669 | 0.937075  |
| 63 | 8  | 0 | 0.823690  | -3.686409 | 1.571246  |
| 64 | 6  | 0 | 1.322931  | -0.602102 | -2.317682 |
| 65 | 8  | 0 | 1.377363  | 0.491512  | -2.824460 |
| 66 | 6  | 0 | 3.193424  | -1.616518 | -3.637679 |
| 67 | 6  | 0 | 1.763297  | -1.843106 | -3.159198 |
| 68 | 6  | 0 | 1.625826  | -3.224066 | -2.522195 |
| 69 | 1  | 0 | 3.465327  | -2.368683 | -4.390182 |
| 70 | 1  | 0 | 3.901960  | -1.721922 | -2.801957 |
| 71 | 1  | 0 | 3.314653  | -0.620644 | -4.077472 |
| 72 | 1  | 0 | 2.279912  | -3.326980 | -1.642449 |

---

|    |   |   |          |           |           |
|----|---|---|----------|-----------|-----------|
| 73 | 1 | 0 | 0.592193 | -3.461867 | -2.234704 |
| 74 | 1 | 0 | 1.944617 | -3.995017 | -3.238043 |
| 75 | 1 | 0 | 1.089931 | -1.787152 | -4.031299 |
